# Supplementary material for: Comparison of the taste mechanisms of umami and bitter peptides from fermented mandarin fish (Chouguiyu) based on molecular docking and electronic tongue technology
Source: Royal Society of Chemistry journal article supplement (doi:10.1039/d3fo02697c), 2023-01-01
Supplement: d3fo02697c1.pdf [file d3fo02697c1.pdf]

## Supplementary Data

### **Comparison of taste mechanism of umami and bitter peptide from fermented mandarin fish (*Chouguiyu*) based on molecular docking and electronic tongue technology**

Chunsheng Li<sup>a,b,1,\*</sup>, Daqiao Yang<sup>a,b,c,1</sup>, Laihao Li<sup>a,b</sup>, Yueqi Wang<sup>a,b</sup>, Shengjun Chen<sup>a,b</sup>, Yongqiang Zhao<sup>a,b</sup>, Wanling Lin<sup>d</sup>

<sup>a</sup>Key Laboratory of Aquatic Product Processing, Ministry of Agriculture and Rural Affairs, National R&D Center for Aquatic Product Processing, South China Sea Fisheries Research Institute, Chinese Academy of Fishery Sciences, Guangzhou 510300, China;

<sup>b</sup>Co-Innovation Center of Jiangsu Marine Bio-industry Technology, Jiangsu Ocean University, Lianyungang 222005, China;

<sup>c</sup>College of Life Sciences, Linyi University, Linyi 276000, China;

<sup>d</sup>School of Life Science and Food Engineering, Hanshan Normal University, Chaozhou 521041, China.

<sup>1</sup>The first two authors contributed equally to this work.

\*Corresponding author:

Chunsheng Li (E-mail: lichunsheng@scsfri.ac.cn)

Fax: +86 20-82031851

Telephone: +86 20-89108313

Address: Key Laboratory of Aquatic Product Processing, Ministry of Agriculture and Rural Affairs, National R&D Center for Aquatic Product Processing, South China Sea Fisheries Research Institute, Chinese Academy of Fishery Sciences, Guangzhou 510300, China.

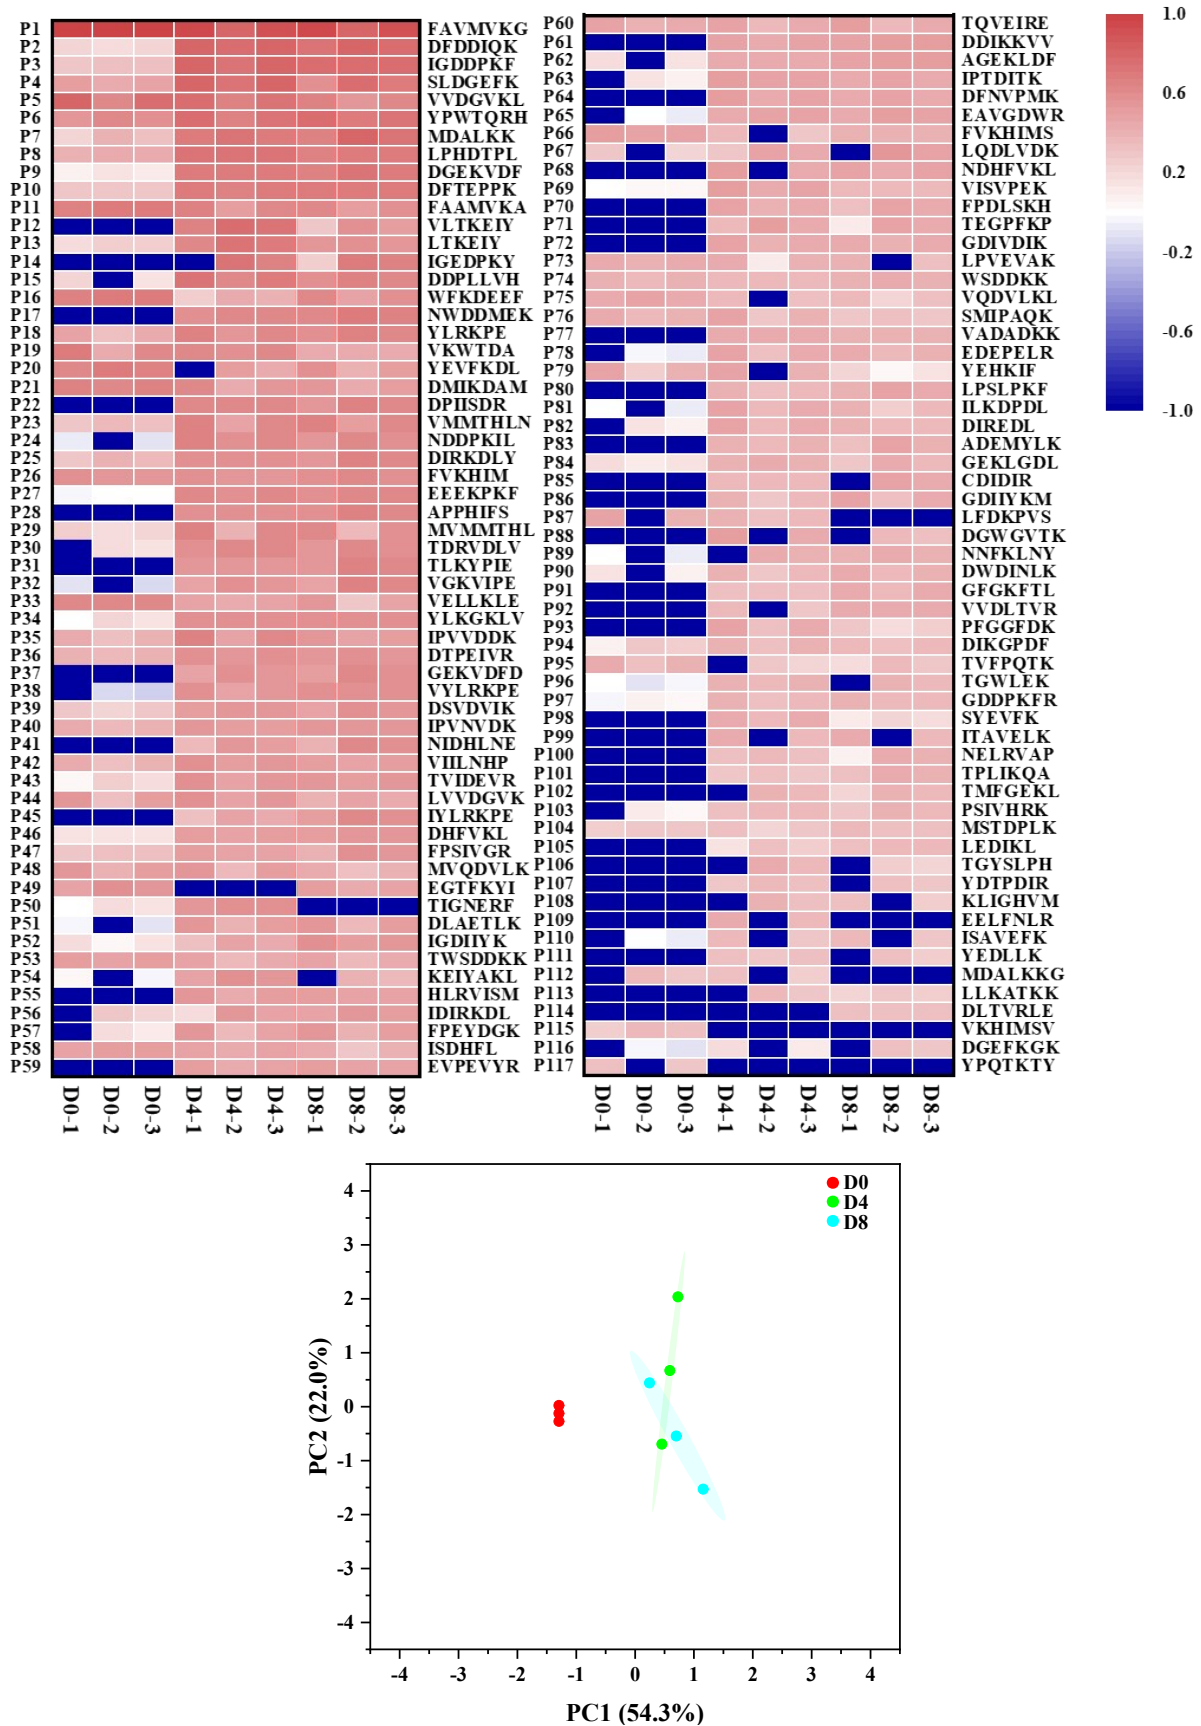

Fig. S1. Abundance heatmap and principal component analysis of 117 oligopeptides at different fermentation time in *Chouguiyu*.

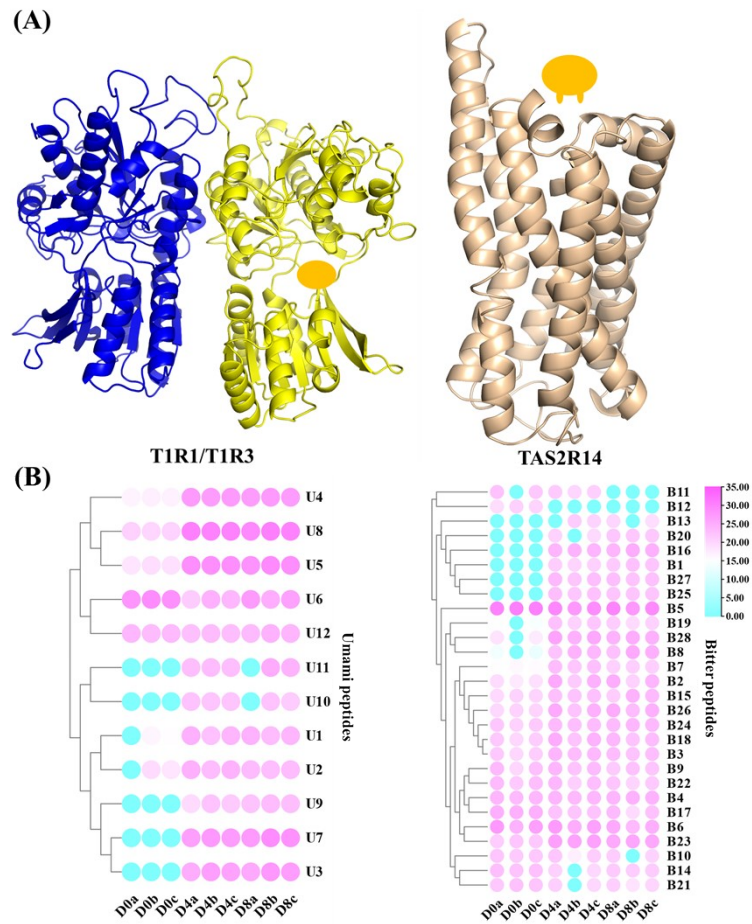

**Fig. S2.** Identification of different taste peptides from *Chouguiyu*. (A) Three-dimensional structure of umami (T1R1/T1R3) and bitter (TAS2R14) taste receptors constructed by homologous simulation and their tentative binding sites. (B) Abundance heatmaps of umami and bitter peptides at different fermentation time.

**Table S1 Sequence and taste classification of 117 peptides from *Chouguiyu***

| Peptide number | Peptide sequence | Amino acids | Bitter AAs (%) | Umami AAs (%) | Label |
|----------------|------------------|-------------|----------------|---------------|-------|
| P1             | FAVMVKG          | 7           | 57.14          | 0             | B5    |
| P2             | DFDDIQK          | 7           | 28.57          | 42.86         | U8    |
| P3             | IGDDPKF          | 7           | 42.86          | 28.57         | -     |
| P4             | SLDGEFK          | 7           | 28.57          | 28.57         | -     |
| P5             | VVDGVKL          | 7           | 57.14          | 14.29         | B6    |
| P6             | YPWTQRH          | 7           | 28.57          | 0             | -     |
| P7             | MDALKK           | 6           | 33.33          | 16.67         | -     |
| P8             | LPHDTPL          | 7           | 57.14          | 14.29         | B23   |
| P9             | DGEKVDF          | 7           | 28.57          | 42.86         | U5    |
| P10            | DFTEPPK          | 7           | 42.86          | 28.57         | -     |
| P11            | FAAMVKA          | 7           | 42.86          | 0             | -     |
| P12            | VLTKEIY          | 7           | 42.86          | 14.29         | -     |
| P13            | LTKEIY           | 6           | 33.33          | 16.67         | -     |
| P14            | IGEDPKY          | 7           | 28.57          | 28.57         | -     |
| P15            | DDPLLH           | 7           | 57.14          | 28.57         | B28   |
| P16            | WFKDEEF          | 7           | 42.86          | 42.86         | U6    |
| P17            | NWDDMEK          | 7           | 28.57          | 42.86         | U7    |
| P18            | YLRKPE           | 6           | 33.33          | 16.67         | -     |
| P19            | VKWTDA           | 6           | 33.33          | 16.67         | -     |
| P20            | YEVFKDL          | 7           | 42.86          | 28.57         | -     |
| P21            | DMIKDAM          | 7           | 42.86          | 28.57         | -     |
| P22            | DPIISDR          | 7           | 42.86          | 28.57         | -     |
| P23            | VMMTHLN          | 7           | 57.14          | 0             | B26   |
| P24            | NDDPKIL          | 7           | 42.86          | 28.57         | -     |
| P25            | DIRKDLY          | 7           | 28.57          | 28.57         | -     |
| P26            | FVKHIM           | 6           | 66.67          | 0             | B4    |
| P27            | EEEKPKF          | 7           | 28.57          | 42.86         | U4    |
| P28            | APPHIFS          | 7           | 57.14          | 0             | B16   |
| P29            | MVMMTHL          | 7           | 71.43          | 0             | B2    |
| P30            | TDRVDLV          | 7           | 42.86          | 28.57         | -     |
| P31            | TLKYPIE          | 7           | 42.86          | 14.29         | -     |
| P32            | VGKVIPE          | 7           | 57.14          | 14.29         | B8    |
| P33            | VELLKLE          | 7           | 57.14          | 28.57         | B17   |
| P34            | YLKGLV           | 7           | 42.86          | 0             | -     |
| P35            | IPVVDDK          | 7           | 57.14          | 28.57         | B18   |
| P36            | DTPEIVR          | 7           | 42.86          | 28.57         | -     |
| P37            | GEKVDFD          | 7           | 28.57          | 42.86         | U3    |
| P38            | VYLRKPE          | 7           | 42.86          | 14.29         | -     |
| P39            | DSVDVIK          | 7           | 42.86          | 28.57         | -     |
| P40            | IPVNVDK          | 7           | 57.14          | 14.29         | B24   |
| P41            | NIDHLNE          | 7           | 28.57          | 28.57         | -     |
| P42            | VIIINHP          | 7           | 71.43          | 0             | B3    |
| P43            | TVIDEVR          | 7           | 42.86          | 28.57         | -     |
| P44            | LVVDGVK          | 7           | 57.14          | 14.29         | B9    |
| P45            | IYLRKPE          | 7           | 42.86          | 14.29         | -     |
| P46            | DHFVKL           | 6           | 50             | 16.67         | -     |
| P47            | FPSIVGR          | 7           | 57.14          | 0             | B15   |
| P48            | MVQDVLK          | 7           | 57.14          | 14.29         | B22   |
| P49            | EGTFKYI          | 7           | 28.57          | 14.29         | -     |
| P50            | TIGNERF          | 7           | 28.57          | 14.29         | -     |
| P51            | DLAETLK          | 7           | 28.57          | 28.57         | -     |
| P52            | IGDIIYK          | 7           | 42.86          | 14.29         | -     |
| P53            | TWSDDKK          | 7           | 14.29          | 28.57         | -     |
| P54            | KEIYAKL          | 7           | 28.57          | 14.29         | -     |

|      |         |   |       |       |     |
|------|---------|---|-------|-------|-----|
| P55  | HLRVISM | 7 | 57.14 | 0     | B27 |
| P56  | IDIRKDL | 7 | 42.86 | 28.57 | -   |
| P57  | FPEYDGK | 7 | 28.57 | 28.57 | -   |
| P58  | ISDHFL  | 6 | 50    | 16.67 | -   |
| P59  | EVPEVYR | 7 | 42.86 | 28.57 | -   |
| P60  | TQVEIRE | 7 | 28.57 | 28.57 | -   |
| P61  | DDIKKVV | 7 | 42.86 | 28.57 | -   |
| P62  | AGEKLDF | 7 | 28.57 | 28.57 | -   |
| P63  | IPTDITK | 7 | 42.86 | 14.29 | -   |
| P64  | DFNVPMK | 7 | 57.14 | 14.29 | B25 |
| P65  | EAVGDWR | 7 | 28.57 | 28.57 | -   |
| P66  | FVKHIMS | 7 | 57.14 | 0     | B14 |
| P67  | LQDLVDK | 7 | 42.86 | 28.57 | -   |
| P68  | NDHFVKL | 7 | 42.86 | 14.29 | -   |
| P69  | VISVPEK | 7 | 57.14 | 14.29 | B7  |
| P70  | FPDLSKH | 7 | 42.86 | 14.29 | -   |
| P71  | TEGPFKP | 7 | 42.86 | 14.29 | -   |
| P72  | GDIVDIK | 7 | 42.86 | 28.57 | -   |
| P73  | LPVEVAK | 7 | 57.14 | 14.29 | B10 |
| P74  | WSDDKK  | 6 | 16.67 | 33.33 | U12 |
| P75  | VQDVLKL | 7 | 57.14 | 14.29 | B21 |
| P76  | SMIPAQK | 7 | 42.86 | 0     | -   |
| P77  | VADADKK | 7 | 14.29 | 28.57 | -   |
| P78  | EDEPELR | 7 | 28.57 | 57.14 | U1  |
| P79  | YEHKIF  | 6 | 33.33 | 16.67 | -   |
| P80  | LPSLPKF | 7 | 71.43 | 0     | B1  |
| P81  | ILKDPDL | 7 | 57.14 | 28.57 | B19 |
| P82  | DIREDL  | 6 | 33.33 | 50    | U2  |
| P83  | ADEMYLK | 7 | 28.57 | 28.57 | -   |
| P84  | GEKLGDL | 7 | 28.57 | 28.57 | -   |
| P85  | CDIDIR  | 6 | 33.33 | 33.33 | U11 |
| P86  | GDIIYKM | 7 | 42.86 | 14.29 | -   |
| P87  | LFDKPVS | 7 | 57.14 | 14.29 | B11 |
| P88  | DGWGVTK | 7 | 28.57 | 14.29 | -   |
| P89  | NNFKLNY | 7 | 28.57 | 0     | -   |
| P90  | DWDINLK | 7 | 42.86 | 28.57 | -   |
| P91  | GFGKFTL | 7 | 42.86 | 0     | -   |
| P92  | VVDLTVR | 7 | 57.14 | 14.29 | B20 |
| P93  | PFGGFDK | 7 | 42.86 | 14.29 | -   |
| P94  | DIKGPFD | 7 | 42.86 | 28.57 | -   |
| P95  | TVFPQTK | 7 | 42.86 | 0     | -   |
| P96  | TGWLEK  | 6 | 33.33 | 16.67 | -   |
| P97  | GDDPKFR | 7 | 28.57 | 28.57 | -   |
| P98  | SYEVFK  | 6 | 33.33 | 16.67 | -   |
| P99  | ITAVELK | 7 | 42.86 | 14.29 | -   |
| P100 | NELRVAP | 7 | 42.86 | 14.29 | -   |
| P101 | TPLIKQA | 7 | 42.86 | 0     | -   |
| P102 | TMFGEKL | 7 | 42.86 | 14.29 | -   |
| P103 | PSIVHRK | 7 | 42.86 | 0     | -   |
| P104 | MSTDPLK | 7 | 42.86 | 14.29 | -   |
| P105 | LEDIKL  | 6 | 50    | 33.33 | U9  |
| P106 | TGYSLPH | 7 | 28.57 | 0     | -   |
| P107 | YDTPDIR | 7 | 28.57 | 28.57 | -   |
| P108 | KLIGHVM | 7 | 57.14 | 0     | B13 |
| P109 | EELFNLR | 7 | 42.86 | 28.57 | -   |
| P110 | ISAVEFK | 7 | 42.86 | 14.29 | -   |
| P111 | YEDLLK  | 6 | 33.33 | 33.33 | U10 |
| P112 | MDALKKG | 7 | 28.57 | 14.29 | -   |
| P113 | LLKATKK | 7 | 28.57 | 0     | -   |

|      |         |   |       |       |     |
|------|---------|---|-------|-------|-----|
| P114 | DLTVRLE | 7 | 42.86 | 28.57 | -   |
| P115 | VKHIMSV | 7 | 57.14 | 0     | B12 |
| P116 | DGEFKGK | 7 | 14.29 | 28.57 | -   |
| P117 | YPQTKTY | 7 | 14.29 | 0     | -   |

---

Note: Threshold of umami and bitter was >30% and >50%, respectively. Umami peptides and bitter peptides were marked as U and B, respectively

**Table S2** Characteristics of peptides with different taste from *Chouguiyu*

| Number | Isoelectric point | Molecular weight (Da) | Charge | Toxin | Hydrophobicity(kcal/mol) | Hydrophobicity | Hydrophilicity |
|--------|-------------------|-----------------------|--------|-------|--------------------------|----------------|----------------|
| U1     | 4.00              | 887.00                | -3.00  | Non   | 23.13                    | -2.33          | 1.89           |
| U2     | 4.03              | 759.89                | -2.00  | Non   | 18.25                    | -1.12          | 1.4            |
| U3     | 4.03              | 808.93                | -2.00  | Non   | 20.59                    | -1.11          | 1.14           |
| U4     | 4.79              | 906.09                | -1.00  | Non   | 22.82                    | -2.44          | 1.79           |
| U5     | 4.03              | 808.93                | -2.00  | Non   | 20.59                    | -1.11          | 1.14           |
| U6     | 4.14              | 1000.16               | -2.00  | Non   | 16.09                    | -1.39          | 0.51           |
| U7     | 4.03              | 937.08                | -2.00  | Non   | 19.70                    | -2.41          | 1.07           |
| U8     | 3.93              | 880.01                | -2.00  | Non   | 19.56                    | -1.51          | 1.13           |
| U9     | 4.37              | 729.96                | -1.00  | Non   | 14.35                    | 0.2            | 0.6            |
| U10    | 4.37              | 779.97                | -1.00  | Non   | 14.76                    | -0.77          | 0.52           |
| U11    | 4.21              | 733.91                | -1.00  | Non   | 14.73                    | 0              | 0.73           |
| U12    | 5.96              | 777.90                | 0.00   | Non   | 19.15                    | -2.75          | 1.48           |
| B1     | 8.75              | 801.09                | 1.00   | Non   | 7.23                     | 0.36           | -0.4           |
| B2     | 6.49              | 862.24                | 0.50   | Non   | 6.76                     | 1.4            | -1.16          |
| B3     | 6.71              | 805.10                | 0.50   | Non   | 7.27                     | 1.24           | -1.03          |
| B4     | 8.76              | 774.08                | 1.50   | Non   | 9.07                     | 1.05           | -0.77          |
| B5     | 8.75              | 751.05                | 1.00   | Non   | 9.05                     | 1.51           | -0.61          |
| B6     | 5.81              | 728.99                | 0.00   | Non   | 12.86                    | 1.23           | -0.04          |
| B7     | 5.97              | 771.02                | 0.00   | Non   | 12.89                    | 0.44           | 0.21           |
| B8     | 5.97              | 741.00                | 0.00   | Non   | 13.58                    | 0.5            | 0.17           |
| B9     | 5.84              | 728.99                | 0.00   | Non   | 12.86                    | 1.23           | -0.04          |
| B10    | 6.00              | 755.02                | 0.00   | Non   | 12.80                    | 0.71           | 0.1            |
| B11    | 5.84              | 805.03                | 0.00   | Non   | 11.52                    | 0.14           | 0.07           |
| B12    | 8.73              | 813.13                | 1.50   | Non   | 10.78                    | 0.99           | -0.47          |
| B13    | 8.76              | 797.14                | 1.50   | Non   | 10.68                    | 0.99           | -0.56          |
| B14    | 8.76              | 861.17                | 1.50   | Non   | 9.53                     | 0.79           | -0.61          |
| B15    | 9.75              | 775.01                | 1.00   | Non   | 8.17                     | 0.6            | -0.36          |
| B16    | 6.79              | 767.97                | 0.50   | Non   | 8.64                     | 0.27           | -0.71          |
| B17    | 4.53              | 843.14                | -1.00  | Non   | 13.75                    | 0.67           | 0.3            |
| B18    | 4.21              | 785.00                | -1.00  | Non   | 16.08                    | 0.06           | 0.6            |
| B19    | 4.21              | 813.06                | -1.00  | Non   | 14.50                    | -0.06          | 0.51           |
| B20    | 5.81              | 801.05                | 0.00   | Non   | 10.97                    | 1.1            | -0.1           |
| B21    | 5.81              | 814.10                | 0.00   | Non   | 11.69                    | 0.73           | -0.06          |
| B22    | 5.59              | 832.13                | 0.00   | Non   | 12.27                    | 0.46           | 0.01           |
| B23    | 5.08              | 792.00                | -0.50  | Non   | 11.90                    | -0.43          | -0.21          |
| B24    | 5.84              | 784.02                | 0.00   | Non   | 13.29                    | 0.06           | 0.2            |
| B25    | 5.84              | 850.09                | 0.00   | Non   | 12.49                    | -0.51          | 0.13           |
| B26    | 6.71              | 845.15                | 0.50   | Non   | 8.28                     | 0.63           | -0.94          |
| B27    | 9.76              | 855.17                | 1.50   | Non   | 9.00                     | 0.84           | -0.51          |
| B28    | 4.20              | 808.00                | -1.50  | Non   | 14.69                    | 0              | 0.06           |

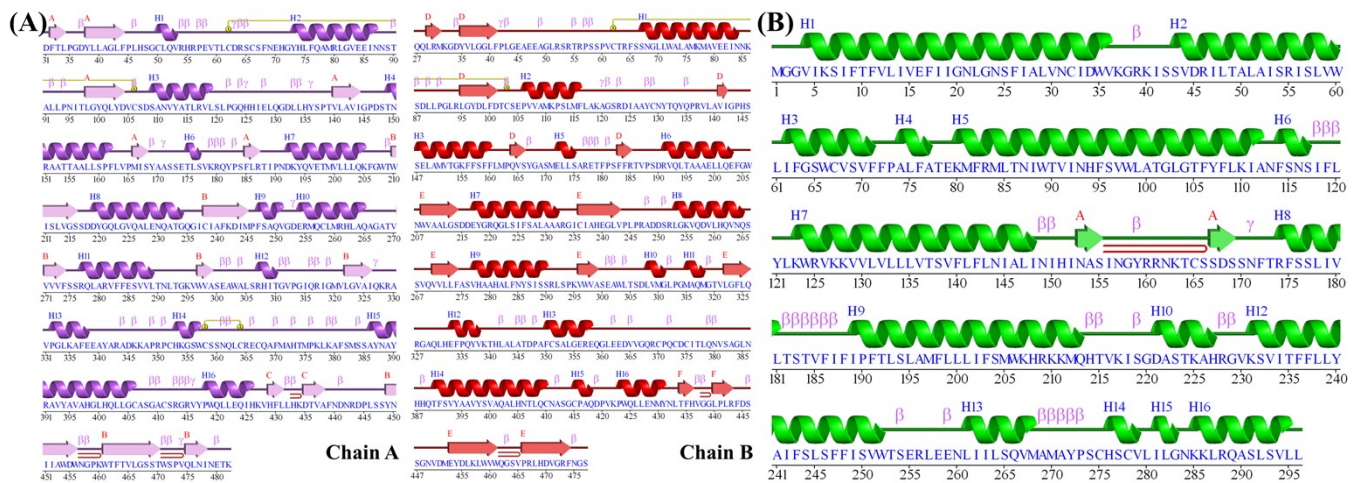

**Fig. S3. Secondary structure of umami and bitter taste receptors after simulation.**



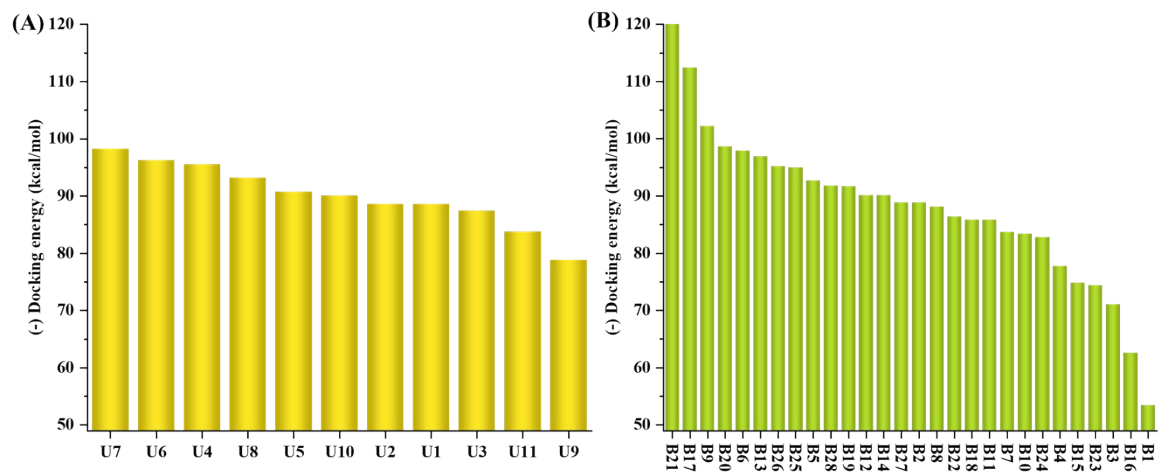

**Fig. S4. Docking energy of umami (A) and bitter (B) peptides with the corresponding taste receptors using molecular docking.**

**Table S3** Molecule docking energy between umami taste receptor and umami peptides.

| Name | Sequence | $\Delta E_{docking}$<br>(kcal/mol) | $\Delta E_{interaction}$<br>(kcal/mol) | $\Delta E_{binding}$<br>(kcal/mol) | $\Delta E_{vdw}$<br>(kcal/mol) | $\Delta E_{ele}$<br>(kcal/mol) |
|------|----------|------------------------------------|----------------------------------------|------------------------------------|--------------------------------|--------------------------------|
| U1   | EDEPELR  | -88.59                             | -72.71                                 | -153.66                            | -27.13                         | -182.33                        |
| U2   | DIREDL   | -88.65                             | -47.41                                 | -169.23                            | -27.41                         | -171.03                        |
| U3   | GEKVDFD  | -87.52                             | -67.37                                 | -130.91                            | -24.13                         | -140.06                        |
| U4   | EEEKPKF  | -95.58                             | -74.15                                 | -187.27                            | -27.23                         | -200.26                        |
| U5   | DGEKVDF  | -90.79                             | -61.74                                 | -207.63                            | -23.00                         | -211.51                        |
| U6   | WFKDEEF  | -96.30                             | -62.26                                 | -159.04                            | -25.14                         | -170.39                        |
| U7   | NWDDMEK  | -98.25                             | -64.22                                 | -195.29                            | -23.31                         | -213.18                        |
| U8   | DFDDIQK  | -93.21                             | -55.24                                 | -224.22                            | -23.52                         | -227.05                        |
| U9   | LEDIKL   | -78.85                             | -55.66                                 | -179.60                            | -26.09                         | -178.89                        |
| U10  | YEDLLK   | -90.06                             | -62.01                                 | -211.53                            | -24.85                         | -217.03                        |
| U11  | CDIDIR   | -83.81                             | -59.62                                 | -195.76                            | -19.36                         | -198.18                        |
| U12  | WSDDKK   | -79.24                             | -54.08                                 | -123.69                            | -17.41                         | -129.27                        |
| Glu  | E        | -14.31                             | -11.25                                 | -21.41                             | -3.24204                       | -23.2728                       |

**Table S4** Molecule docking energy between bitter taste receptor and bitter peptides.

| Name | Sequence | $\Delta E_{docking}$<br>(kcal/mol) | $\Delta E_{interaction}$<br>(kcal/mol) | $\Delta E_{binding}$<br>(kcal/mol) | $\Delta E_{vdw}$<br>(kcal/mol) | $\Delta E_{ele}$<br>(kcal/mol) |
|------|----------|------------------------------------|----------------------------------------|------------------------------------|--------------------------------|--------------------------------|
| B1   | LPSLPKF  | -53.47                             | -65.28                                 | -137.71                            | -25.25                         | -160.01                        |
| B2   | MVMMTHL  | -88.86                             | -65.39                                 | -210.26                            | -29.46                         | -212.16                        |
| B3   | VIILNHP  | -71.11                             | -64.16                                 | -214.50                            | -31.50                         | -226.64                        |
| B4   | FVKHIM   | -77.80                             | -55.84                                 | -176.77                            | -27.95                         | -169.68                        |
| B5   | FAVMVKG  | -92.73                             | -71.17                                 | -193.80                            | -23.21                         | -192.57                        |
| B6   | VVDGVKL  | -97.90                             | -70.75                                 | -213.60                            | -23.65                         | -212.23                        |
| B7   | VISVPEK  | -83.76                             | -77.40                                 | -140.09                            | -24.09                         | -157.10                        |
| B8   | VGKVIPE  | -88.11                             | -92.18                                 | -121.04                            | -25.93                         | -135.76                        |
| B9   | LVVDGVK  | -102.24                            | -70.47                                 | -217.19                            | -22.78                         | -217.97                        |
| B10  | LPVEVAK  | -83.41                             | -76.86                                 | -183.10                            | -26.21                         | -190.41                        |
| B11  | LFDKPVS  | -85.85                             | -73.83                                 | -183.88                            | -21.45                         | -200.02                        |
| B12  | VKHIMSV  | -90.15                             | -68.73                                 | -199.56                            | -27.21                         | -201.54                        |
| B13  | KLIGHVM  | -96.90                             | -74.51                                 | -210.00                            | -29.93                         | -205.49                        |
| B14  | FVKHIMS  | -90.13                             | -59.99                                 | -211.20                            | -28.67                         | -209.42                        |
| B15  | FPSIVGR  | -74.81                             | -68.49                                 | -155.81                            | -19.81                         | -169.73                        |
| B16  | APPHIFS  | -62.58                             | -62.62                                 | -162.59                            | -22.95                         | -185.55                        |
| B17  | VELLKLE  | -112.45                            | -92.72                                 | -183.79                            | -29.51                         | -184.12                        |
| B18  | IPVVDDK  | -85.89                             | -77.15                                 | -108.91                            | -27.84                         | -128.32                        |
| B19  | ILKDPDL  | -91.75                             | -89.16                                 | -150.29                            | -29.92                         | -162.64                        |
| B20  | VVDLTVR  | -98.63                             | -70.14                                 | -222.17                            | -24.15                         | -229.04                        |
| B21  | VQDVLKL  | -120.19                            | -90.39                                 | -239.41                            | -30.52                         | -236.53                        |
| B22  | MVQDVLK  | -86.45                             | -61.72                                 | -251.00                            | -27.90                         | -252.96                        |
| B23  | LPHDTPL  | -74.42                             | -81.50                                 | -157.23                            | -26.91                         | -183.11                        |
| B24  | IPNVVDK  | -82.82                             | -67.32                                 | -178.55                            | -29.80                         | -189.57                        |
| B25  | DFNVPMK  | -94.99                             | -84.18                                 | -237.90                            | -25.03                         | -252.34                        |
| B26  | VMMTHLN  | -95.27                             | -66.04                                 | -236.36                            | -28.64                         | -242.94                        |
| B27  | HLRVISM  | -88.91                             | -58.75                                 | -209.80                            | -27.44                         | -213.37                        |
| B28  | DDPLL VH | -91.81                             | -85.42                                 | -191.32                            | -30.95                         | -197.71                        |
| Pro  | P        | -17.64                             | -34.31                                 | 24.99                              | -2.13                          | 7.45                           |

**Table S5** Detailed information of interactions between umami taste receptor and umami peptides as well as positive control

| Name | Interaction position    | Distance | Category      | Type                       | From          | From chemistry | To           | To chemistry |
|------|-------------------------|----------|---------------|----------------------------|---------------|----------------|--------------|--------------|
| U7   | B:Arg52:NE - U7:O117    | 4.41329  | Electrostatic | Attractive charge          | B:Arg52:NE    | Positive       | U7:O117      | Negative     |
|      | B:Arg247:NE - U7:O93    | 5.21391  | Electrostatic | Attractive charge          | B:Arg247:NE   | Positive       | U7:O93       | Negative     |
|      | B:Arg247:NE - U7:O117   | 3.03238  | Electrostatic | Attractive charge          | B:Arg247:NE   | Positive       | U7:O117      | Negative     |
|      | B:Arg52:HH12 - U7:O92   | 2.66042  | Hydrogen bond | Conventional hydrogen bond | B:Arg52:HH12  | H-donor        | U7:O92       | H-Acceptor   |
|      | B:Arg52:HH12 - U7:O117  | 2.67952  | Hydrogen bond | Conventional hydrogen bond | B:Arg52:HH12  | H-donor        | U7:O117      | H-Acceptor   |
|      | B:Arg247:HH11 - U7:O116 | 1.98656  | Hydrogen bond | Conventional hydrogen bond | B:Arg247:HH11 | H-donor        | U7:O116      | H-Acceptor   |
|      | B:Ala248:HN - U7:O93    | 2.37699  | Hydrogen bond | Conventional hydrogen bond | B:Ala248:HN   | H-donor        | U7:O93       | H-Acceptor   |
|      | B:Val277:HN - U7:O48    | 2.08417  | Hydrogen bond | Conventional hydrogen bond | B:Val277:HN   | H-donor        | U7:O48       | H-Acceptor   |
|      | B:Arg247:HA - U7:O93    | 2.44776  | Hydrogen bond | Carbon hydrogen bond       | B:Arg247:HA   | H-donor        | U7:O93       | H-Acceptor   |
|      | B:Ser276:HB2 - U7:O48   | 2.56105  | Hydrogen bond | Carbon hydrogen bond       | B:Ser276:HB2  | H-donor        | U7:O48       | H-Acceptor   |
|      | U7:H29 - B:Ser306:OG    | 2.86841  | Hydrogen bond | Carbon hydrogen bond       | U7:H29        | H-donor        | B:Ser306:OG  | H-Acceptor   |
|      | U7:H55 - B:His278:NE2   | 2.4734   | Hydrogen bond | Carbon hydrogen bond       | U7:H55        | H-donor        | B:His278:NE2 | H-Acceptor   |
|      | U7:O93 - B:His278       | 4.43356  | Electrostatic | Pi-anion                   | U7:O93        | Negative       | B:His278     | Pi-Orbitals  |
| U6   | B:Arg52:NE - U6:O91     | 5.00861  | Electrostatic | Attractive charge          | B:Arg52:NE    | Positive       | U6:O91       | Negative     |
|      | B:Arg52:NE - U6:O129    | 3.12163  | Electrostatic | Attractive charge          | B:Arg52:NE    | Positive       | U6:O129      | Negative     |
|      | B:Arg247:NE - U6:O91    | 4.18429  | Electrostatic | Attractive charge          | B:Arg247:NE   | Positive       | U6:O91       | Negative     |
|      | B:Arg52:HH11 - U6:O129  | 1.89158  | Hydrogen bond | Conventional hydrogen bond | B:Arg52:HH11  | H-donor        | U6:O129      | H-Acceptor   |
|      | B:Arg52:HH12 - U6:O90   | 2.27344  | Hydrogen bond | Conventional hydrogen bond | B:Arg52:HH12  | H-donor        | U6:O90       | H-Acceptor   |
|      | B:Arg247:HE - U6:O90    | 2.28914  | Hydrogen bond | Conventional               | B:Arg247:HE   | H-donor        | U6:O90       | H-Acceptor   |

|                        |                        |               |                             |                                             |               |                  |              |                     |
|------------------------|------------------------|---------------|-----------------------------|---------------------------------------------|---------------|------------------|--------------|---------------------|
|                        | U6:H63 - B:Gly50:O     | 2.62954       | Hydrogen bond               | hydrogen bond<br>Conventional hydrogen bond | U6:H63        | H-donor          | B:Gly50:O    | H-Acceptor          |
|                        | U6:H64 - B:Gly50:O     | 2.53872       | Hydrogen bond               | Conventional hydrogen bond                  | U6:H64        | H-donor          | B:Gly50:O    | H-Acceptor          |
|                        | U6:H95 - B:His278:NE2  | 2.63104       | Hydrogen bond               | Conventional hydrogen bond                  | U6:H95        | H-donor          | B:His278:NE2 | H-Acceptor          |
| U4                     | B:Arg52:HE - U4:O44    | 2.04749       | Hydrogen bond;electrostatic | Salt bridge;attractive charge               | B:Arg52:HE    | H-donor;positive | U4:O44       | H-Acceptor;Negative |
|                        | B:Arg247:NE - U4:O29   | 4.73363       | Electrostatic               | Attractive charge                           | B:Arg247:NE   | Positive         | U4:O29       | Negative            |
|                        | B:Arg52:HH11 - U4:O43  | 2.48258       | Hydrogen bond               | Conventional hydrogen bond                  | B:Arg52:HH11  | H-donor          | U4:O43       | H-Acceptor          |
|                        | B:Arg52:HH12 - U4:O16  | 2.4497        | Hydrogen bond               | Conventional hydrogen bond                  | B:Arg52:HH12  | H-donor          | U4:O16       | H-Acceptor          |
|                        | B:Arg52:HH12 - U4:O28  | 2.80824       | Hydrogen bond               | Conventional hydrogen bond                  | B:Arg52:HH12  | H-donor          | U4:O28       | H-Acceptor          |
|                        | B:Arg247:HE - U4:O16   | 2.89981       | Hydrogen bond               | Conventional hydrogen bond                  | B:Arg247:HE   | H-donor          | U4:O16       | H-Acceptor          |
|                        | B:Arg247:HE - U4:O28   | 1.99366       | Hydrogen bond               | Conventional hydrogen bond                  | B:Arg247:HE   | H-donor          | U4:O28       | H-Acceptor          |
|                        | B:Arg247:HH11 - U4:O28 | 2.36076       | Hydrogen bond               | Conventional hydrogen bond                  | B:Arg247:HH11 | H-donor          | U4:O28       | H-Acceptor          |
|                        | B:Thr305:HN - U4:O122  | 2.46618       | Hydrogen bond               | Conventional hydrogen bond                  | B:Thr305:HN   | H-donor          | U4:O122      | H-Acceptor          |
|                        | B:Thr305:HG1 - U4:O122 | 2.05793       | Hydrogen bond               | Conventional hydrogen bond                  | B:Thr305:HG1  | H-donor          | U4:O122      | H-Acceptor          |
|                        | B:His278:HE1 - U4:O13  | 2.42398       | Hydrogen bond               | Carbon hydrogen bond                        | B:His278:HE1  | H-donor          | U4:O13       | H-Acceptor          |
|                        | B:Ser306:HA - U4:O123  | 2.67901       | Hydrogen bond               | Carbon hydrogen bond                        | B:Ser306:HA   | H-donor          | U4:O123      | H-Acceptor          |
| B:Ser306:HB1 - U4:O123 | 2.70211                | Hydrogen bond | Carbon hydrogen bond        | B:Ser306:HB1                                | H-donor       | U4:O123          | H-Acceptor   |                     |

|    |                        |         |                             |                               |               |                  |              |                     |
|----|------------------------|---------|-----------------------------|-------------------------------|---------------|------------------|--------------|---------------------|
|    | U4:H97 - B:His278:NE2  | 2.44975 | Hydrogen bond               | bond<br>Carbon hydrogen bond  | U4:H97        | H-donor          | B:His278:NE2 | H-Acceptor          |
|    | B:His388 - U4          | 4.13556 | Hydrophobic                 | Pi-pi stacked                 | B:His388      | Pi-orbitals      | U4           | Pi-Orbitals         |
|    | U4 - B:Leu304          | 5.19339 | Hydrophobic                 | Pi-alkyl                      | U4            | Pi-orbitals      | B:Leu304     | Alkyl               |
|    | U4 - B:Leu325          | 5.29918 | Hydrophobic                 | Pi-alkyl                      | U4            | Pi-orbitals      | B:Leu325     | Alkyl               |
|    | B:Arg247:HE - U8:O11   | 2.01261 | Hydrogen bond;electrostatic | Salt bridge;attractive charge | B:Arg247:HE   | H-donor;positive | U8:O11       | H-Acceptor;Negative |
|    | B:Arg52:NE - U8:O11    | 5.27346 | Electrostatic               | Attractive charge             | B:Arg52:NE    | Positive         | U8:O11       | Negative            |
|    | B:Arg52:HH11 - U8:O10  | 2.12983 | Hydrogen bond               | Conventional hydrogen bond    | B:Arg52:HH11  | H-donor          | U8:O10       | H-Acceptor          |
|    | B:Arg52:HH12 - U8:O11  | 2.58165 | Hydrogen bond               | Conventional hydrogen bond    | B:Arg52:HH12  | H-donor          | U8:O11       | H-Acceptor          |
|    | B:Arg247:HH11 - U8:O11 | 2.96663 | Hydrogen bond               | Conventional hydrogen bond    | B:Arg247:HH11 | H-donor          | U8:O11       | H-Acceptor          |
| U8 | B:Val277:HN - U8:O115  | 1.97402 | Hydrogen bond               | Conventional hydrogen bond    | B:Val277:HN   | H-donor          | U8:O115      | H-Acceptor          |
|    | U8:H111 - B:Ala302:O   | 2.94446 | Hydrogen bond               | Conventional hydrogen bond    | U8:H111       | H-donor          | B:Ala302:O   | H-Acceptor          |
|    | U8:H111 - B:Trp303:O   | 2.31327 | Hydrogen bond               | Conventional hydrogen bond    | U8:H111       | H-donor          | B:Trp303:O   | H-Acceptor          |
|    | B:Ser276:HB2 - U8:O115 | 2.41109 | Hydrogen bond               | Carbon hydrogen bond          | B:Ser276:HB2  | H-donor          | U8:O115      | H-Acceptor          |
|    | U8:H109 - B:Ala302:O   | 2.47366 | Hydrogen bond               | Carbon hydrogen bond          | U8:H109       | H-donor          | B:Ala302:O   | H-Acceptor          |
|    | U8:C64 - B:Val277      | 4.72817 | Hydrophobic                 | Alkyl                         | U8:C64        | Alkyl            | B:Val277     | Alkyl               |
|    | U8:C64 - B:Leu308      | 4.23868 | Hydrophobic                 | Alkyl                         | U8:C64        | Alkyl            | B:Leu308     | Alkyl               |
| U5 | B:Arg52:HE - U5:O33    | 2.21916 | Hydrogen bond;electrostatic | Salt bridge;attractive charge | B:Arg52:HE    | H-donor;positive | U5:O33       | H-Acceptor;Negative |
|    | B:Arg247:HE - U5:O11   | 2.01275 | Hydrogen                    | Salt bridge;attractive        | B:Arg247:HE   | H-               | U5:O11       | H-                  |

|     |                        |         | bond;electrostatic | charge                        |              | donor;positive |                  | Acceptor;Neg<br>ative |
|-----|------------------------|---------|--------------------|-------------------------------|--------------|----------------|------------------|-----------------------|
|     | B:Arg52:NE - U5:O11    | 5.52869 | Electrostatic      | Attractive charge             | B:Arg52:NE   | Positive       | U5:O11           | Negative              |
|     | B:Arg52:HH11 - U5:O33  | 2.0208  | Hydrogen bond      | Conventional<br>hydrogen bond | B:Arg52:HH11 | H-donor        | U5:O33           | H-Acceptor            |
|     | U5:H53 - B:Ser306:OG   | 2.01803 | Hydrogen bond      | Conventional<br>hydrogen bond | U5:H53       | H-donor        | B:Ser306:OG      | H-Acceptor            |
|     | B:His387:HE1 - U5:O105 | 2.57013 | Hydrogen bond      | Carbon hydrogen<br>bond       | B:His387:HE1 | H-donor        | U5:O105          | H-Acceptor            |
|     | B:His388:HD2 - U5:O104 | 2.52737 | Hydrogen bond      | Carbon hydrogen<br>bond       | B:His388:HD2 | H-donor        | U5:O104          | H-Acceptor            |
|     | Glu:H2 - B:His278:NE2  | 2.94788 | Hydrogen bond      | Conventional<br>hydrogen bond | Glu:H2       | H-donor        | B:His278:NE<br>2 | H-Acceptor            |
| Glu | Glu:H15 - B:Ser306:OG  | 2.06167 | Hydrogen bond      | Conventional<br>hydrogen bond | Glu:H15      | H-donor        | B:Ser306:OG      | H-Acceptor            |
|     | Glu:H5 - B:His278:NE2  | 2.62862 | Hydrogen bond      | Carbon hydrogen<br>bond       | Glu:H5       | H-donor        | B:His278:NE<br>2 | H-Acceptor            |

**Table S6** Detailed information of interactions between bitter taste receptor and bitter peptides as well as positive control

| Name | Interaction position     | Distance | Category      | Type                       | From          | From chemistry | To         | To chemistry |
|------|--------------------------|----------|---------------|----------------------------|---------------|----------------|------------|--------------|
| B21  | A:Arg228:NE - B21:O122   | 4.36718  | Electrostatic | Attractive charge          | A:Arg228:NE   | Positive       | B21:O122   | Negative     |
|      | A:Arg288:NE - B21:O122   | 4.57836  | Electrostatic | Attractive charge          | A:Arg288:NE   | Positive       | B21:O122   | Negative     |
|      | A:Arg209:HH21 - B21:O29  | 1.9756   | Hydrogen bond | Conventional hydrogen bond | A:Arg209:HH21 | H-donor        | B21:O29    | H-Acceptor   |
|      | A:Arg209:HH21 - B21:O102 | 2.29919  | Hydrogen bond | Conventional hydrogen bond | A:Arg209:HH21 | H-donor        | B21:O102   | H-Acceptor   |
|      | A:Arg209:HH12 - B21:O46  | 1.83044  | Hydrogen bond | Conventional hydrogen bond | A:Arg209:HH12 | H-donor        | B21:O46    | H-Acceptor   |
|      | A:Arg209:HH12 - B21:O81  | 2.4878   | Hydrogen bond | Conventional hydrogen bond | A:Arg209:HH12 | H-donor        | B21:O81    | H-Acceptor   |
|      | A:Arg209:HH22 - B21:O81  | 1.95419  | Hydrogen bond | Conventional hydrogen bond | A:Arg209:HH22 | H-donor        | B21:O81    | H-Acceptor   |
|      | A:Arg288:HH22 - B21:O122 | 1.85769  | Hydrogen bond | Conventional hydrogen bond | A:Arg288:HH22 | H-donor        | B21:O122   | H-Acceptor   |
|      | B21:H3 - A:Gly283:O      | 2.90655  | Hydrogen bond | Conventional hydrogen bond | B21:H3        | H-donor        | A:Gly283:O | H-Acceptor   |
|      | B21:H99 - A:Ser219:O     | 1.87465  | Hydrogen bond | Conventional hydrogen bond | B21:H99       | H-donor        | A:Ser219:O | H-Acceptor   |
|      | A:Arg228:HD2 - B21:O29   | 3.05616  | Hydrogen bond | Carbon hydrogen bond       | A:Arg228:HD2  | H-donor        | B21:O29    | H-Acceptor   |
|      | A:Lys285:HE1 - B21:O122  | 2.49518  | Hydrogen bond | Carbon hydrogen bond       | A:Lys285:HE1  | H-donor        | B21:O122   | H-Acceptor   |
|      | A:Lys285:HE2 - B21:O17   | 2.48393  | Hydrogen bond | Carbon hydrogen bond       | A:Lys285:HE2  | H-donor        | B21:O17    | H-Acceptor   |
| B17  | A:Arg228:NE - B17:O123   | 4.19869  | Electrostatic | Attractive charge          | A:Arg228:NE   | Positive       | B17:O123   | Negative     |
|      | A:Arg228:NE - B17:O126   | 5.49477  | Electrostatic | Attractive charge          | A:Arg228:NE   | Positive       | B17:O126   | Negative     |
|      | A:Arg288:NE - B17:O126   | 5.09704  | Electrostatic | Attractive charge          | A:Arg288:NE   | Positive       | B17:O126   | Negative     |
|      | A:Arg209:HH21 - B17:O110 | 2.52549  | Hydrogen bond | Conventional hydrogen bond | A:Arg209:HH21 | H-donor        | B17:O110   | H-Acceptor   |



|    |                          |         |               |                            |               |             |              |            |
|----|--------------------------|---------|---------------|----------------------------|---------------|-------------|--------------|------------|
|    | A:Arg209:HH12 - B17:O32  | 2.92412 | Hydrogen bond | Conventional hydrogen bond | A:Arg209:HH12 | H-donor     | B17:O32      | H-Acceptor |
|    | A:Arg209:HH12 - B17:O51  | 2.33624 | Hydrogen bond | Conventional hydrogen bond | A:Arg209:HH12 | H-donor     | B17:O51      | H-Acceptor |
|    | A:Arg209:HH22 - B17:O91  | 2.1909  | Hydrogen bond | Conventional hydrogen bond | A:Arg209:HH22 | H-donor     | B17:O91      | H-Acceptor |
|    | A:Lys285:HZ2 - B17:O17   | 2.04619 | Hydrogen bond | Conventional hydrogen bond | A:Lys285:HZ2  | H-donor     | B17:O17      | H-Acceptor |
|    | A:Arg288:HH12 - B17:O126 | 1.80997 | Hydrogen bond | Conventional hydrogen bond | A:Arg288:HH12 | H-donor     | B17:O126     | H-Acceptor |
|    | A:Arg288:HH22 - B17:O125 | 1.83282 | Hydrogen bond | Conventional hydrogen bond | A:Arg288:HH22 | H-donor     | B17:O125     | H-Acceptor |
|    | B17:H19 - A:His208:NE2   | 2.34852 | Hydrogen bond | Conventional hydrogen bond | B17:H19       | H-donor     | A:His208:NE2 | H-Acceptor |
|    | A:His208:HE1 - B17:O29   | 2.72747 | Hydrogen bond | Carbon hydrogen bond       | A:His208:HE1  | H-donor     | B17:O29      | H-Acceptor |
|    | A:Arg228:HD1 - B17:O123  | 2.54277 | Hydrogen bond | Carbon hydrogen bond       | A:Arg228:HD1  | H-donor     | B17:O123     | H-Acceptor |
|    | B17:H21 - A:His208:NE2   | 2.62736 | Hydrogen bond | Carbon hydrogen bond       | B17:H21       | H-donor     | A:His208:NE2 | H-Acceptor |
|    | A:Met212:SD - B17:O32    | 3.29282 | Other         | Sulfur-x                   | A:Met212:SD   | Sulfur      | B17:O32      | O,N,S      |
|    | B17:C12 - A:Ile111       | 5.21283 | Hydrophobic   | Alkyl                      | B17:C12       | Alkyl       | A:Ile111     | Alkyl      |
|    | B17:C65 - A:Ile218       | 5.01215 | Hydrophobic   | Alkyl                      | B17:C65       | Alkyl       | A:Ile218     | Alkyl      |
|    | B17:C101 - A:Ile218      | 4.74972 | Hydrophobic   | Alkyl                      | B17:C101      | Alkyl       | A:Ile218     | Alkyl      |
|    | B17:C105 - A:Ile218      | 4.65997 | Hydrophobic   | Alkyl                      | B17:C105      | Alkyl       | A:Ile218     | Alkyl      |
|    | A:His208 - B17:C12       | 4.19001 | Hydrophobic   | Pi-alkyl                   | A:His208      | Pi-orbitals | B17:C12      | Alkyl      |
|    | A:Arg228:NE - B9:O109    | 3.59851 | Electrostatic | Attractive charge          | A:Arg228:NE   | Positive    | B9:O109      | Negative   |
|    | A:Arg288:NE - B9:O109    | 4.97101 | Electrostatic | Attractive charge          | A:Arg288:NE   | Positive    | B9:O109      | Negative   |
| B9 | A:Arg209:HH12 - B9:O64   | 3.03845 | Hydrogen bond | Conventional hydrogen bond | A:Arg209:HH12 | H-donor     | B9:O64       | H-Acceptor |
|    | A:Arg209:HH22 - B9:O52   | 1.8857  | Hydrogen bond | Conventional hydrogen bond | A:Arg209:HH22 | H-donor     | B9:O52       | H-Acceptor |

|                         |         |                              |                                |               |                   |            |                      |
|-------------------------|---------|------------------------------|--------------------------------|---------------|-------------------|------------|----------------------|
| A:Thr224:HG1 - B9:O87   | 2.83104 | Hydrogen bond                | Conventional hydrogen bond     | A:Thr224:HG1  | H-donor           | B9:O87     | H-Acceptor           |
| A:Arg228:HH21 - B9:O36  | 1.696   | Hydrogen bond                | Conventional hydrogen bond     | A:Arg228:HH21 | H-donor           | B9:O36     | H-Acceptor           |
| A:Lys285:HN - B9:O20    | 2.2226  | Hydrogen bond                | Conventional hydrogen bond     | A:Lys285:HN   | H-donor           | B9:O20     | H-Acceptor           |
| A:Arg288:HH12 - B9:O109 | 2.54416 | Hydrogen bond                | Conventional hydrogen bond     | A:Arg288:HH12 | H-donor           | B9:O109    | H-Acceptor           |
| A:Arg288:HH22 - B9:O109 | 2.31114 | Hydrogen bond                | Conventional hydrogen bond     | A:Arg288:HH22 | H-donor           | B9:O109    | H-Acceptor           |
| A:Asp221:HA - B9:O71    | 2.58923 | Hydrogen bond                | Carbon hydrogen bond           | A:Asp221:HA   | H-donor           | B9:O71     | H-Acceptor           |
| A:Thr224:HB - B9:O71    | 2.81504 | Hydrogen bond                | Carbon hydrogen bond           | A:Thr224:HB   | H-donor           | B9:O71     | H-Acceptor           |
| B9:H24 - A:Gly283:O     | 2.86709 | Hydrogen bond                | Carbon hydrogen bond           | B9:H24        | H-donor           | A:Gly283:O | H-Acceptor           |
| B9:C27 - A:Lys110       | 4.36326 | Hydrophobic                  | Alkyl                          | B9:C27        | Alkyl             | A:Lys110   | Alkyl                |
| B9:C27 - A:Ile111       | 5.05985 | Hydrophobic                  | Alkyl                          | B9:C27        | Alkyl             | A:Ile111   | Alkyl                |
| B9:C31 - A:Lys110       | 5.07568 | Hydrophobic                  | Alkyl                          | B9:C31        | Alkyl             | A:Lys110   | Alkyl                |
| B9:C43 - A:Met205       | 4.62003 | Hydrophobic                  | Alkyl                          | B9:C43        | Alkyl             | A:Met205   | Alkyl                |
| B9:C47 - A:Ile111       | 4.48061 | Hydrophobic                  | Alkyl                          | B9:C47        | Alkyl             | A:Ile111   | Alkyl                |
| A:Arg228:HE - B20:O43   | 1.95976 | Hydrogen bond; electrostatic | Salt bridge; attractive charge | A:Arg228:HE   | H-donor; positive | B20:O43    | H-Acceptor; Negative |
| A:Arg209:NE - B20:O43   | 5.42828 | Electrostatic                | Attractive charge              | A:Arg209:NE   | Positive          | B20:O43    | Negative             |
| A:Arg209:HE - B20:O42   | 2.84036 | Hydrogen bond                | Conventional hydrogen bond     | A:Arg209:HE   | H-donor           | B20:O42    | H-Acceptor           |
| A:Arg209:HH21 - B20:O42 | 1.98749 | Hydrogen bond                | Conventional hydrogen bond     | A:Arg209:HH21 | H-donor           | B20:O42    | H-Acceptor           |
| A:Arg209:HH22 - B20:O71 | 1.82615 | Hydrogen bond                | Conventional hydrogen bond     | A:Arg209:HH22 | H-donor           | B20:O71    | H-Acceptor           |
| A:Lys285:HZ1 - B20:O78  | 2.45152 | Hydrogen bond                | Conventional hydrogen bond     | A:Lys285:HZ1  | H-donor           | B20:O78    | H-Acceptor           |

|    |                         |         |               |                            |               |          |              |            |
|----|-------------------------|---------|---------------|----------------------------|---------------|----------|--------------|------------|
|    | A:Lys285:HZ2 - B20:O17  | 2.91364 | Hydrogen bond | Conventional hydrogen bond | A:Lys285:HZ2  | H-donor  | B20:O17      | H-Acceptor |
|    | A:Arg288:HH22 - B20:O45 | 2.07079 | Hydrogen bond | Conventional hydrogen bond | A:Arg288:HH22 | H-donor  | B20:O45      | H-Acceptor |
|    | B20:H116 - A:Ser219:O   | 1.81706 | Hydrogen bond | Conventional hydrogen bond | B20:H116      | H-donor  | A:Ser219:O   | H-Acceptor |
|    | B20:H117 - A:Gly220:O   | 3.02711 | Hydrogen bond | Conventional hydrogen bond | B20:H117      | H-donor  | A:Gly220:O   | H-Acceptor |
|    | B20:H117 - A:Thr224:OG1 | 2.1367  | Hydrogen bond | Conventional hydrogen bond | B20:H117      | H-donor  | A:Thr224:OG1 | H-Acceptor |
|    | B20:H119 - A:Ser219:O   | 2.11729 | Hydrogen bond | Conventional hydrogen bond | B20:H119      | H-donor  | A:Ser219:O   | H-Acceptor |
|    | B20:C8 - A:Met212       | 4.65896 | Hydrophobic   | Alkyl                      | B20:C8        | Alkyl    | A:Met212     | Alkyl      |
|    | B20:C24 - A:Lys285      | 4.17145 | Hydrophobic   | Alkyl                      | B20:C24       | Alkyl    | A:Lys285     | Alkyl      |
|    | A:Arg228:NE - B6:O43    | 5.18709 | Electrostatic | Attractive charge          | A:Arg228:NE   | Positive | B6:O43       | Negative   |
|    | A:Arg288:NE - B6:O43    | 5.16893 | Electrostatic | Attractive charge          | A:Arg288:NE   | Positive | B6:O43       | Negative   |
|    | A:Arg209:HH12 - B6:O68  | 1.76689 | Hydrogen bond | Conventional hydrogen bond | A:Arg209:HH12 | H-donor  | B6:O68       | H-Acceptor |
|    | A:Arg209:HH22 - B6:O45  | 2.33138 | Hydrogen bond | Conventional hydrogen bond | A:Arg209:HH22 | H-donor  | B6:O45       | H-Acceptor |
|    | A:Arg209:HH22 - B6:O68  | 1.91586 | Hydrogen bond | Conventional hydrogen bond | A:Arg209:HH22 | H-donor  | B6:O68       | H-Acceptor |
| B6 | A:Thr224:HG1 - B6:O17   | 2.16854 | Hydrogen bond | Conventional hydrogen bond | A:Thr224:HG1  | H-donor  | B6:O17       | H-Acceptor |
|    | A:Lys285:HZ1 - B6:O52   | 1.97992 | Hydrogen bond | Conventional hydrogen bond | A:Lys285:HZ1  | H-donor  | B6:O52       | H-Acceptor |
|    | A:Arg288:HH12 - B6:O43  | 1.94025 | Hydrogen bond | Conventional hydrogen bond | A:Arg288:HH12 | H-donor  | B6:O43       | H-Acceptor |
|    | A:Arg288:HH22 - B6:O42  | 1.85353 | Hydrogen bond | Conventional hydrogen bond | A:Arg288:HH22 | H-donor  | B6:O42       | H-Acceptor |
|    | B6:H2 - A:Gly220:O      | 2.21359 | Hydrogen bond | Conventional hydrogen bond | B6:H2         | H-donor  | A:Gly220:O   | H-Acceptor |

|     |                         |         |               |                            |               |             |              |            |
|-----|-------------------------|---------|---------------|----------------------------|---------------|-------------|--------------|------------|
|     | B6:H2 - A:Thr224:OG1    | 1.99273 | Hydrogen bond | Conventional hydrogen bond | B6:H2         | H-donor     | A:Thr224:OG1 | H-Acceptor |
|     | B6:H3 - A:Ser219:O      | 2.67101 | Hydrogen bond | Conventional hydrogen bond | B6:H3         | H-donor     | A:Ser219:O   | H-Acceptor |
|     | A:Gly220:HA2 - B6:N1    | 2.66913 | Hydrogen bond | Carbon hydrogen bond       | A:Gly220:HA2  | H-donor     | B6:N1        | H-Acceptor |
|     | A:Lys285:HE1 - B6:O42   | 2.62772 | Hydrogen bond | Carbon hydrogen bond       | A:Lys285:HE1  | H-donor     | B6:O42       | H-Acceptor |
|     | A:Lys285:HE2 - B6:O42   | 3.07887 | Hydrogen bond | Carbon hydrogen bond       | A:Lys285:HE2  | H-donor     | B6:O42       | H-Acceptor |
|     | B6:C103 - A:Lys110      | 4.61836 | Hydrophobic   | Alkyl                      | B6:C103       | Alkyl       | A:Lys110     | Alkyl      |
|     | B6:C103 - A:Ile111      | 5.07022 | Hydrophobic   | Alkyl                      | B6:C103       | Alkyl       | A:Ile111     | Alkyl      |
|     | A:Phe114 - B6:C99       | 4.802   | Hydrophobic   | Pi-alkyl                   | A:Phe114      | Pi-orbitals | B6:C99       | Alkyl      |
|     | A:Phe114 - B6:C103      | 5.22656 | Hydrophobic   | Pi-alkyl                   | A:Phe114      | Pi-orbitals | B6:C103      | Alkyl      |
|     | A:Arg228:NE - Pro:O15   | 3.87449 | Electrostatic | Attractive charge          | A:Arg228:NE   | Positive    | Pro:O15      | Negative   |
|     | A:Arg288:NE - Pro:O15   | 4.78158 | Electrostatic | Attractive charge          | A:Arg288:NE   | Positive    | Pro:O15      | Negative   |
|     | A:Arg209:HH22 - Pro:N1  | 2.1217  | Hydrogen bond | Conventional hydrogen bond | A:Arg209:HH22 | H-donor     | Pro:N1       | H-Acceptor |
| Pro | A:Arg288:HH12 - Pro:O15 | 2.15693 | Hydrogen bond | Conventional hydrogen bond | A:Arg288:HH12 | H-donor     | Pro:O15      | H-Acceptor |
|     | A:Lys285:HE1 - Pro:O14  | 3.04799 | Hydrogen bond | Carbon hydrogen bond       | A:Lys285:HE1  | H-donor     | Pro:O14      | H-Acceptor |
|     | A:Lys285:HE2 - Pro:O14  | 2.95925 | Hydrogen bond | Carbon hydrogen bond       | A:Lys285:HE2  | H-donor     | Pro:O14      | H-Acceptor |

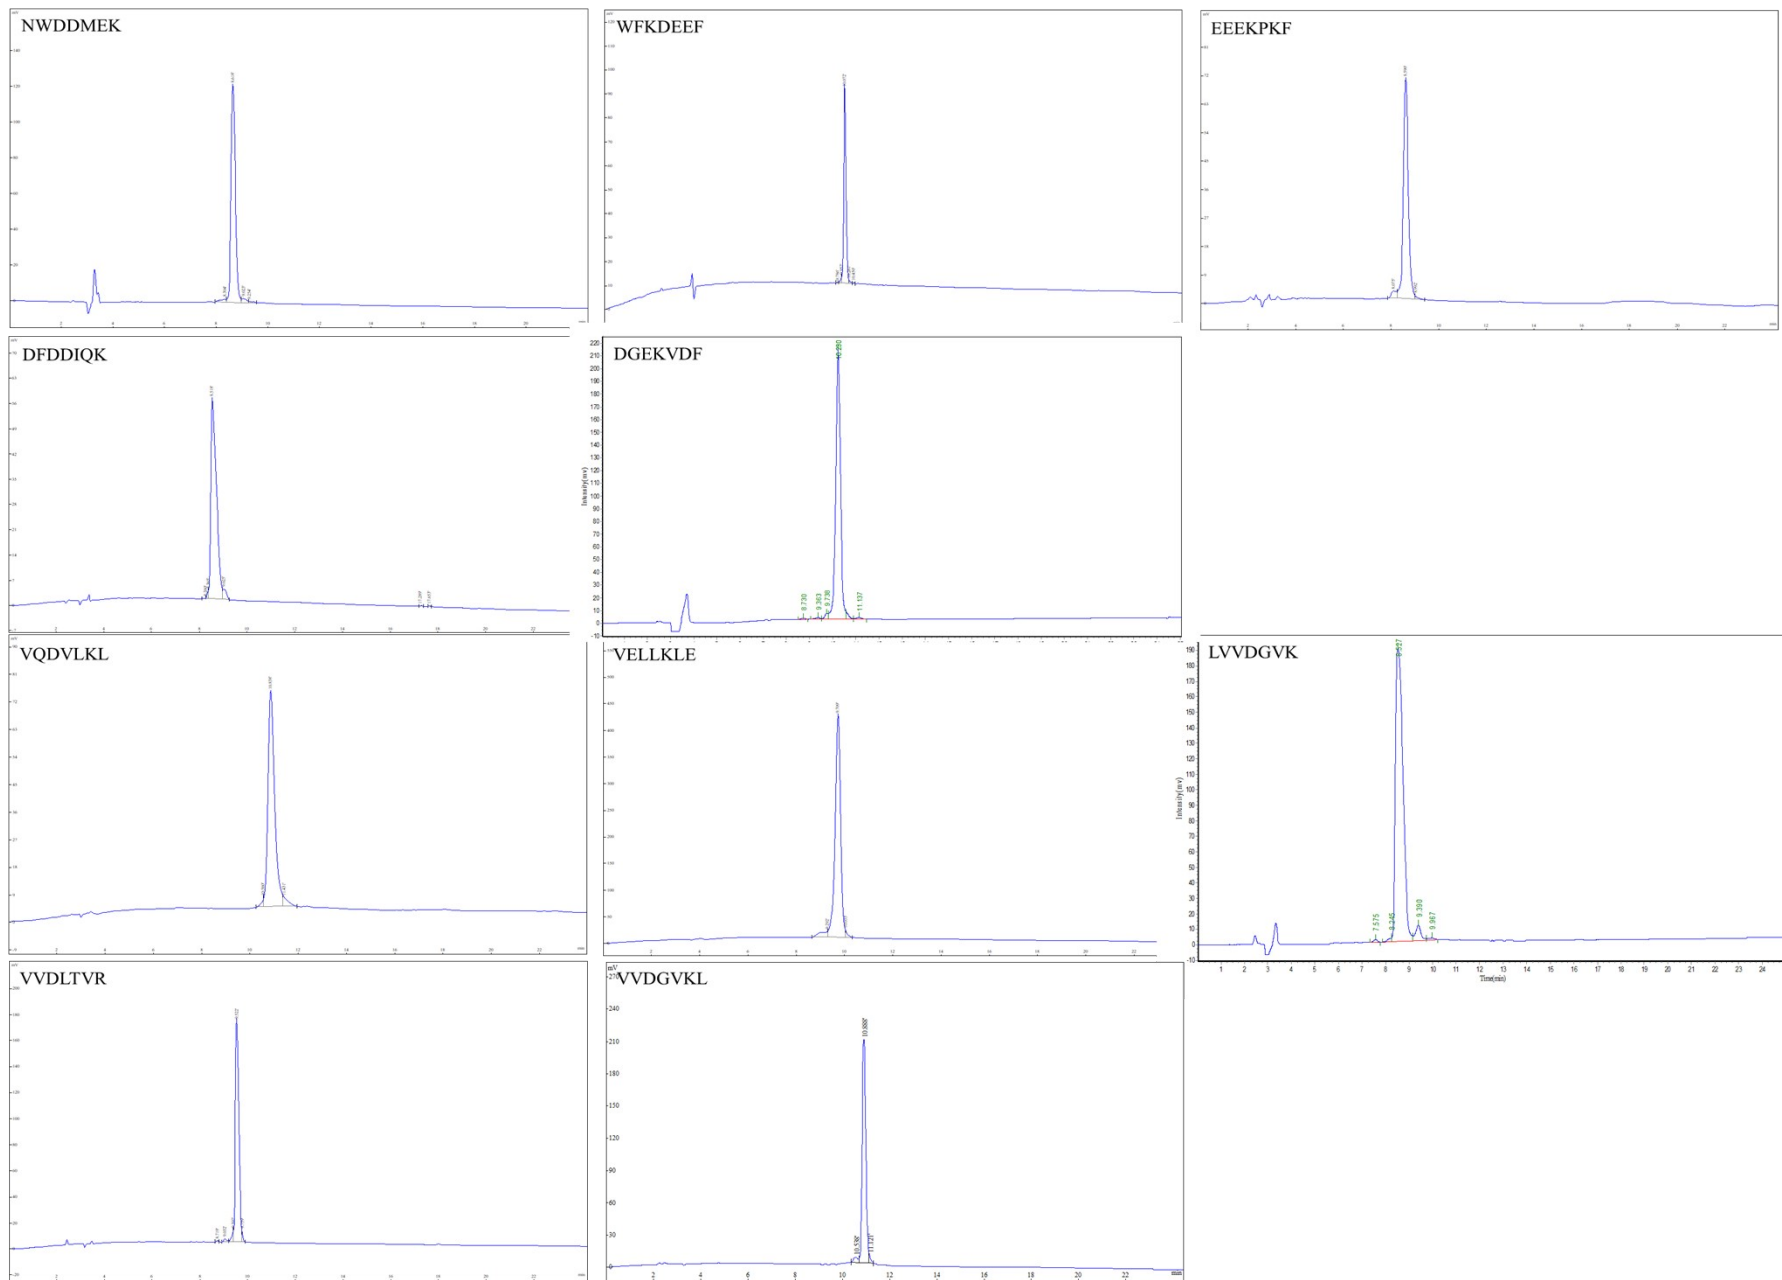

**Fig. S5. Purity of the synthetic peptide analyzed by HPLC**

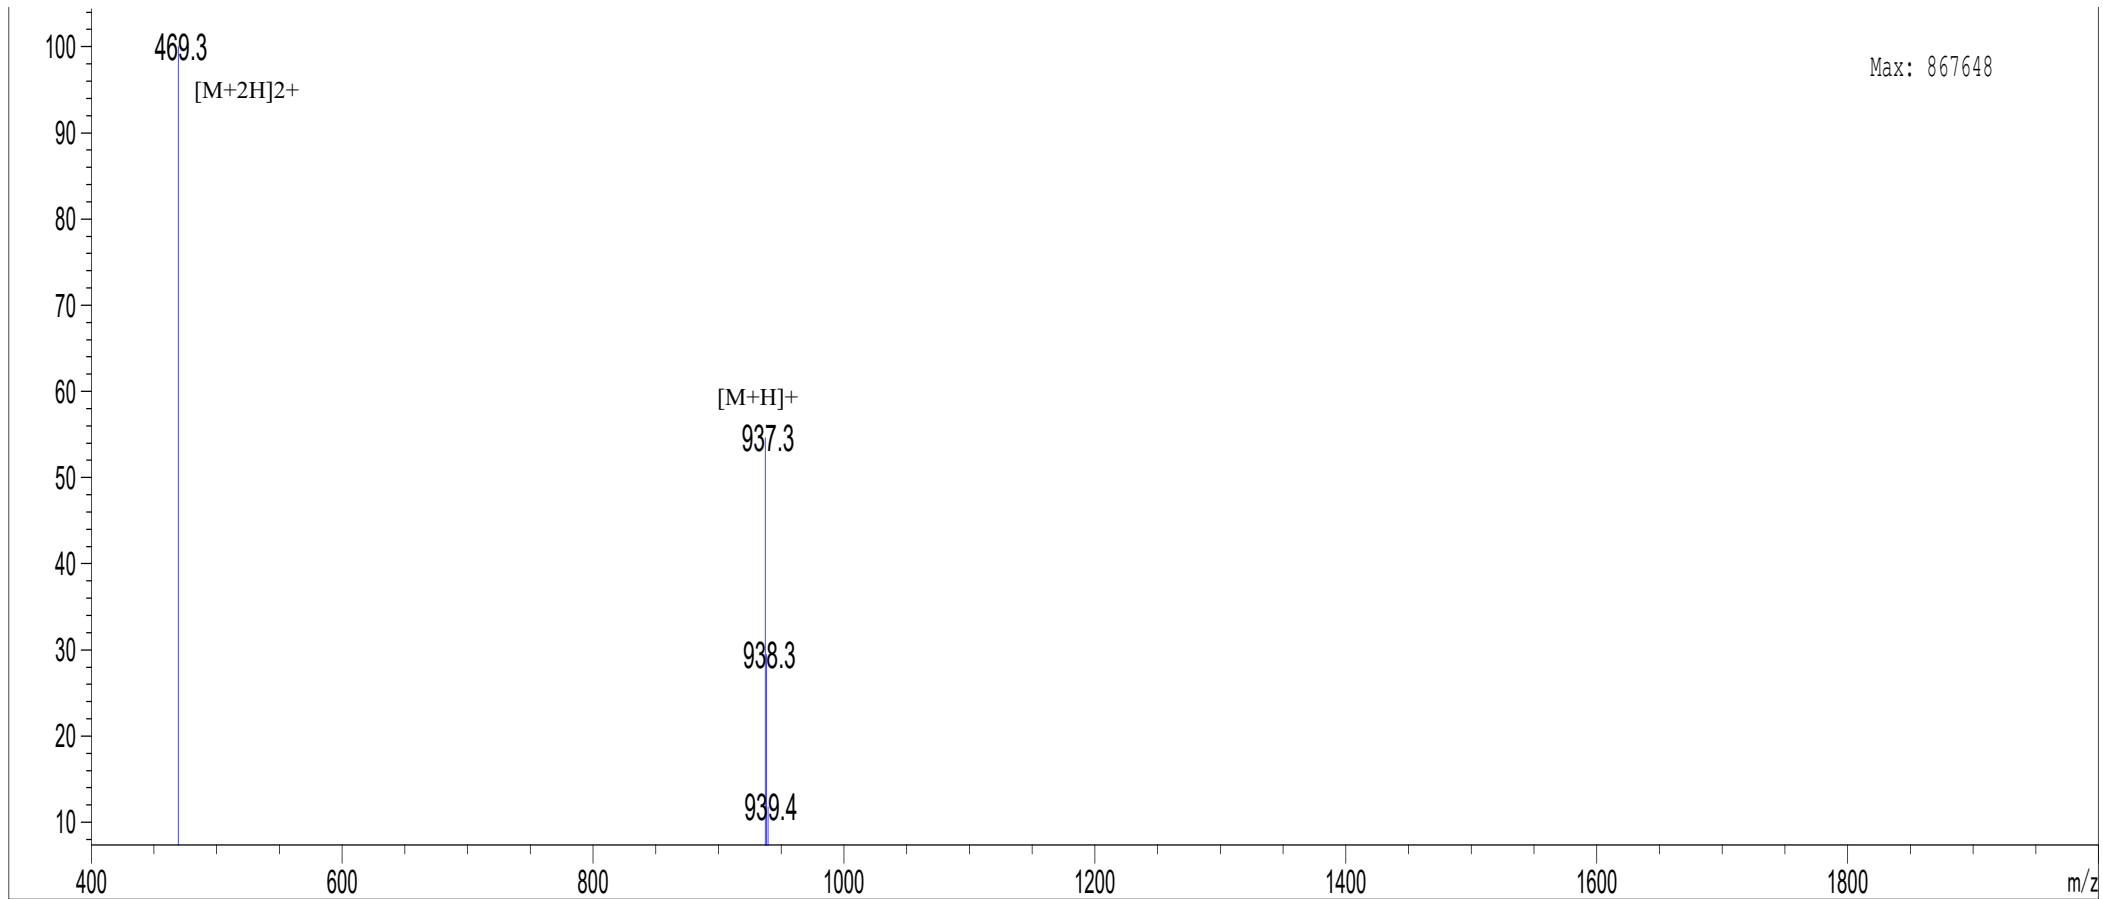

**Sample Description**

Analyzed date: 2022-11-16  
 Analyst: YDQ  
 Sample: NWDDMEK  
 M.W.: 936.98  
 Lot. No.: Yuanpeptide-810805

**Instrument**

Instrument: Agilent-6125B  
 Probe: ESI  
 Nebulizer Gas Flow: 1.5L/min  
 CDL: -20.0v  
 CDL Temp.: 250 °C  
 Block Temp.: 200 °C

Probe Bias: +4.5kv  
 Detector: 1.5kv  
 T. Flow: 0.2ml/min  
 B. Conc.: 50%H2O/50%ACN

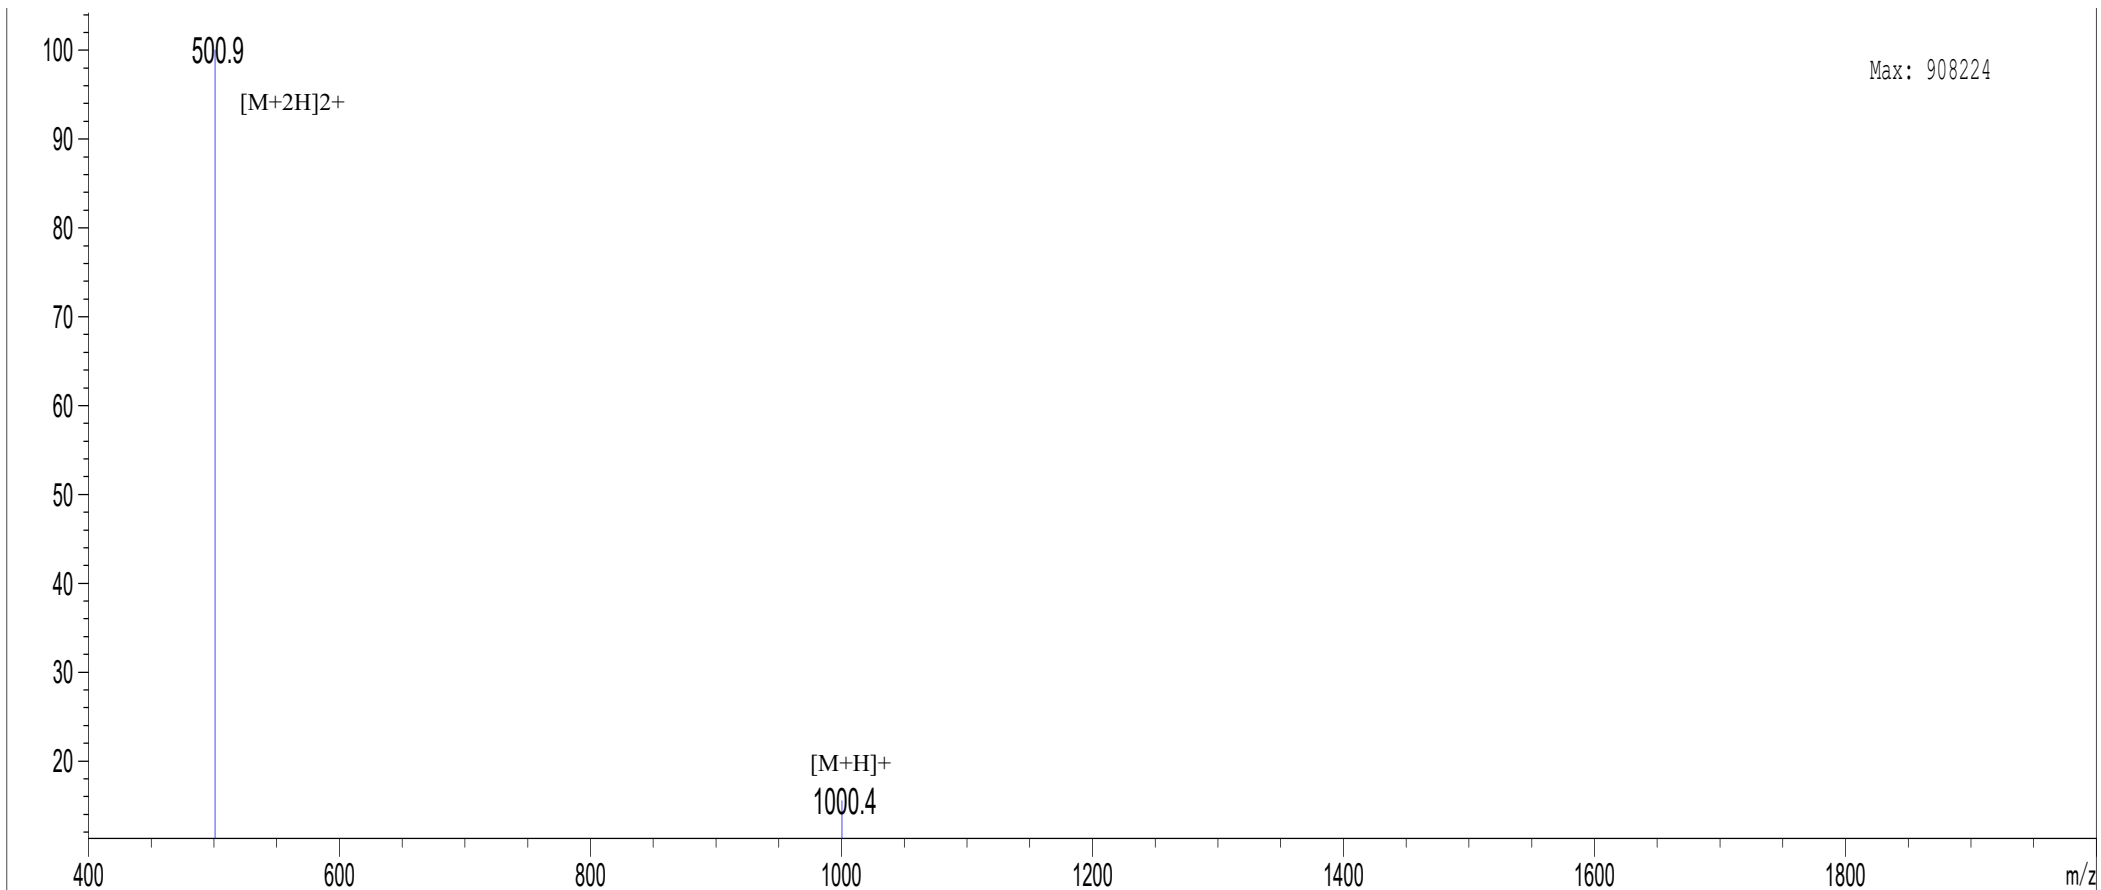

**Sample Description**

Analyzed date: 2022-11-15  
 Analyst: YDQ  
 Sample: WFKDEEF  
 M.W.: 1000.06  
 Lot. No.: Yuanpeptide-1027858

**Instrument**

Agilent-6125B  
 Probe: ESI  
 Nebulizer Gas Flow: 1.5L/min  
 CDL: -20.0v  
 CDL Temp.: 250 °C  
 Block Temp.: 200 °C

Probe Bias: +4.5kv  
 Detector: 1.5kv  
 T. Flow: 0.2ml/min  
 B. Conc.: 50%H<sub>2</sub>O/50%ACN

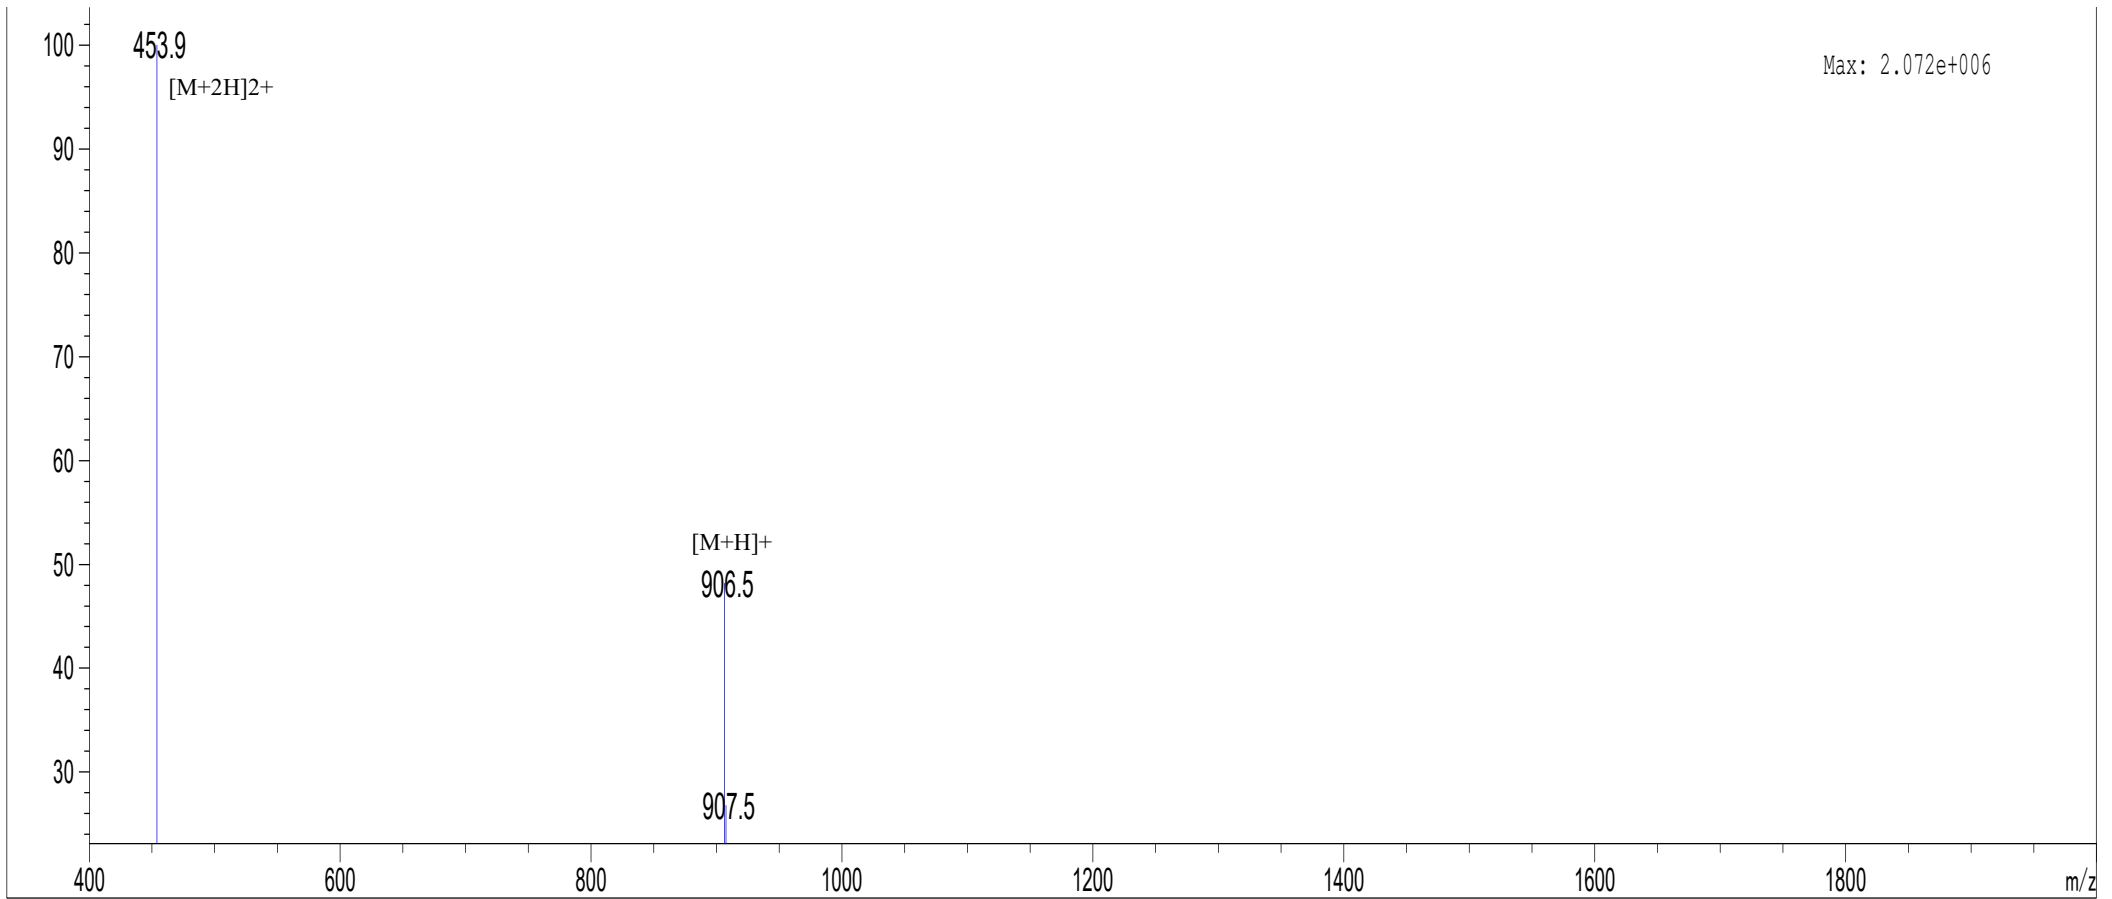

**Sample Description**

Analyzed date: 2022-11-16  
 Analyst: YDQ  
 Sample: EEEKPKF  
 M.W.: 905.99  
 Lot. No.: Yuanpeptide-1027859

**Instrument**

Agilent-6125B  
 Probe: ESI  
 Nebulizer Gas Flow: 1.5L/min  
 CDL: -20.0v  
 CDL Temp.: 250 °C  
 Block Temp.: 200 °C

Probe Bias: +4.5kv  
 Detector: 1.5kv  
 T. Flow: 0.2ml/min  
 B. Conc.: 50%H2O/50%ACN



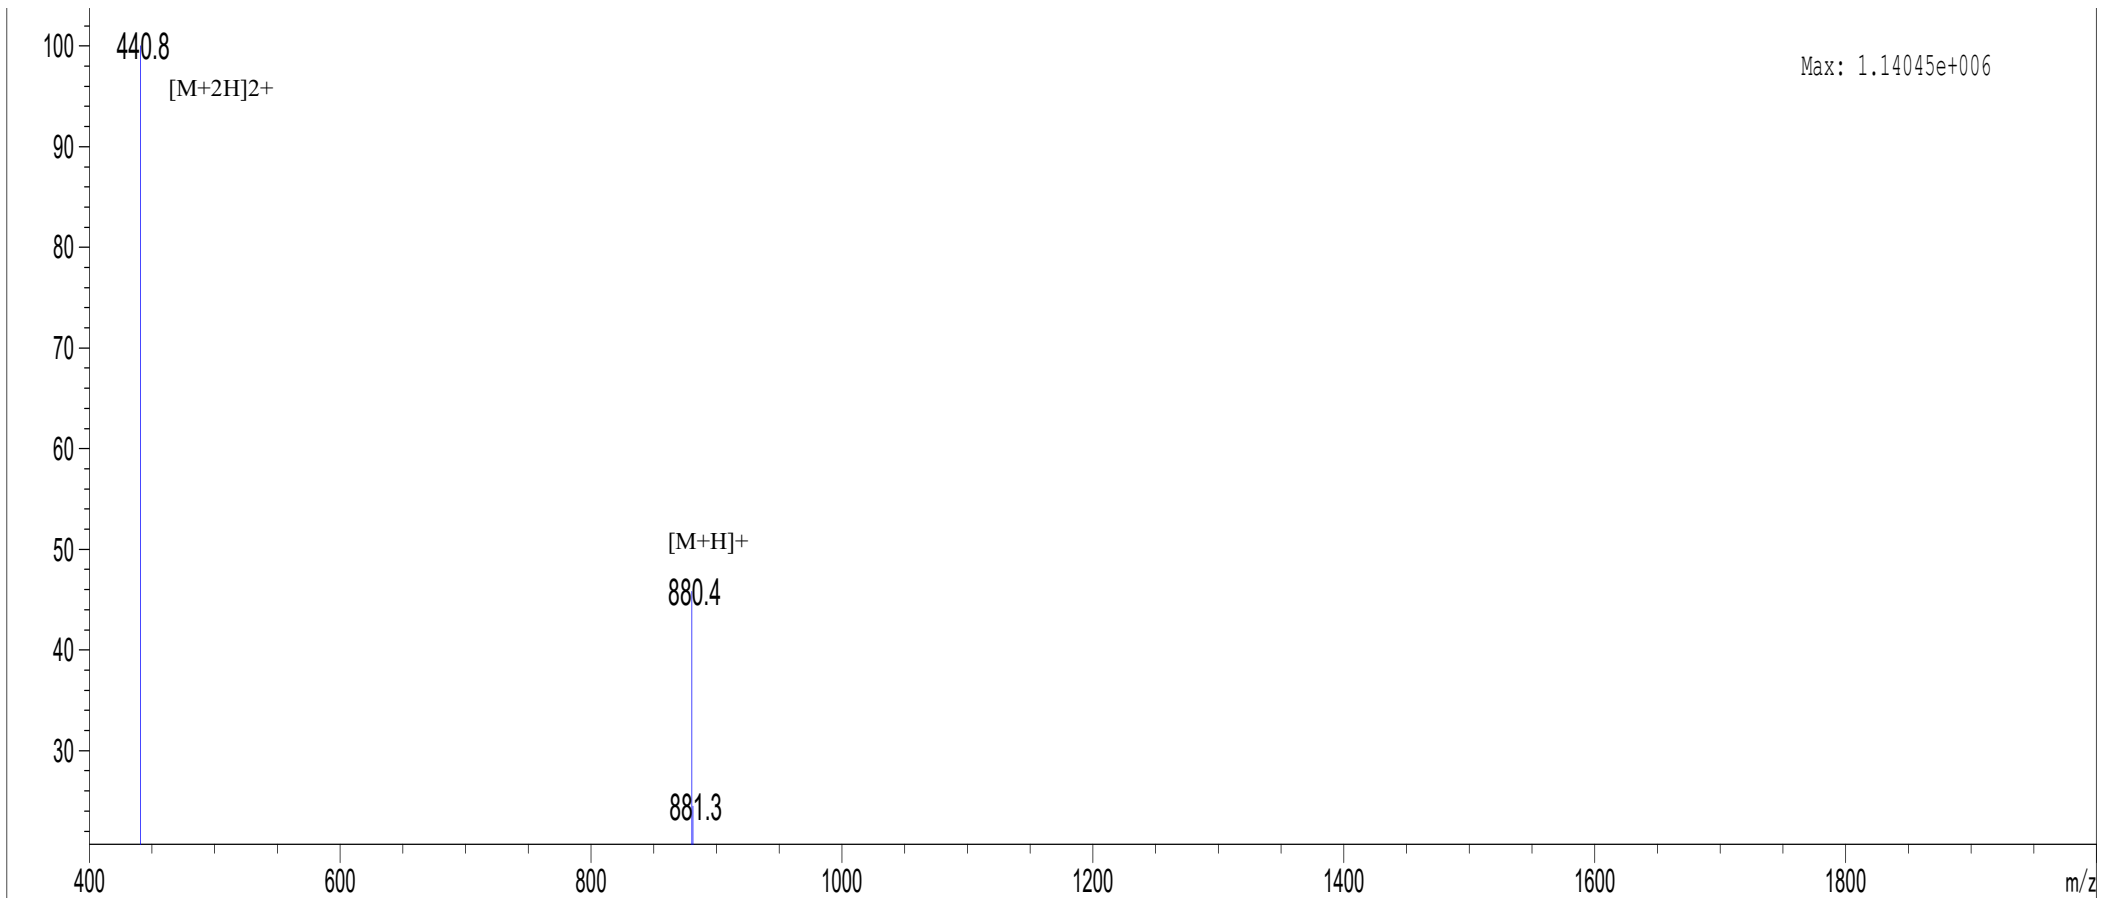

**Sample Description**

Analyzed date: 2022-11-16  
 Analyst: YDQ  
 Sample: DFDDIQK  
 M.W.: 879.9  
 Lot. No.: Yuanpeptide-982727

**Instrument**

Agilent-6125B  
 Probe: ESI  
 Nebulizer Gas Flow: 1.5L/min  
 CDL: -20.0v  
 CDL Temp.: 250 °C  
 Block Temp.: 200 °C

Probe Bias: +4.5kv  
 Detector: 1.5kv  
 T. Flow: 0.2ml/min  
 B. Conc.: 50%H2O/50%ACN

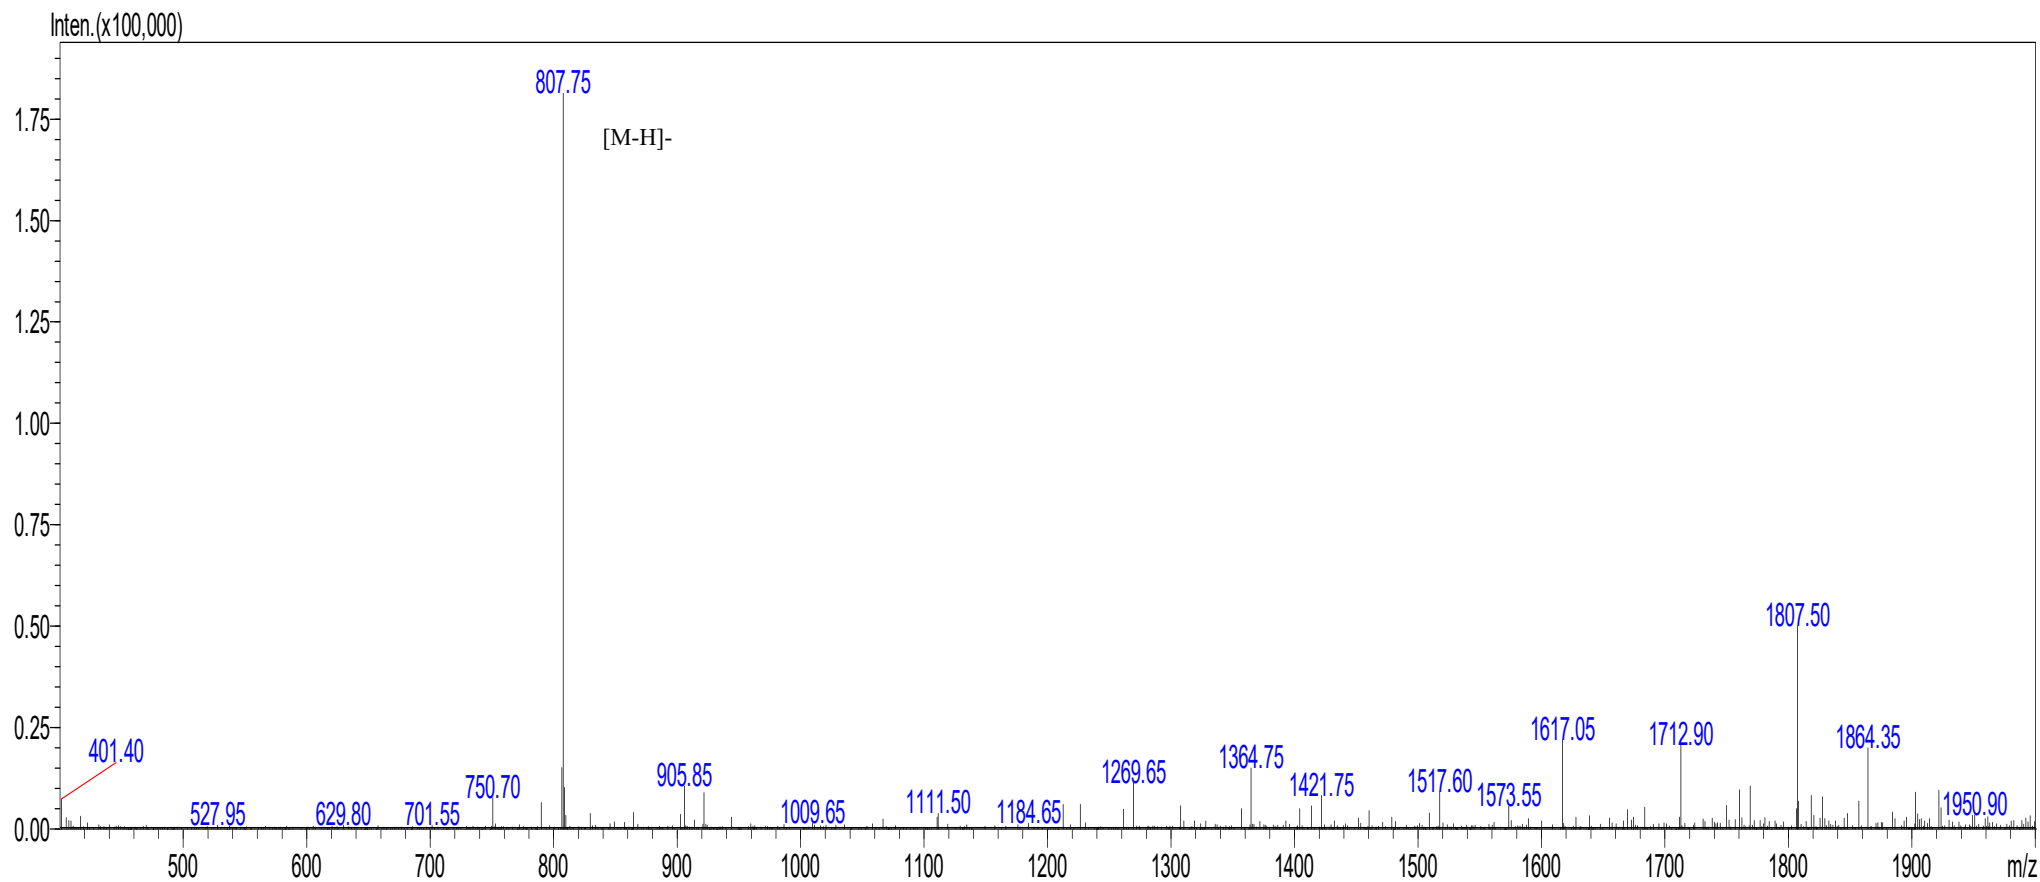

Sample Description

Analyzed date: 2022-11-15  
 Analyst: YDQ  
 Sample: DGEKVDF  
 M.W.: 808.83  
 Lot. No.: Yuanpeptide-1027860

Instrument

SHIMADZU LCMS-2020  
 Probe: ESI  
 Nebulizer Gas Flow: 1.5L/min  
 CDL: -20.0v  
 CDL Temp.: 250 °C  
 Block Temp.: 200 °C

SHIMADZU LCMS-2020

Probe Bias: +4.5kv  
 Detector: 1.5kv  
 T. Flow: 0.2ml/min  
 B. Conc.: 50%H2O/50%ACN

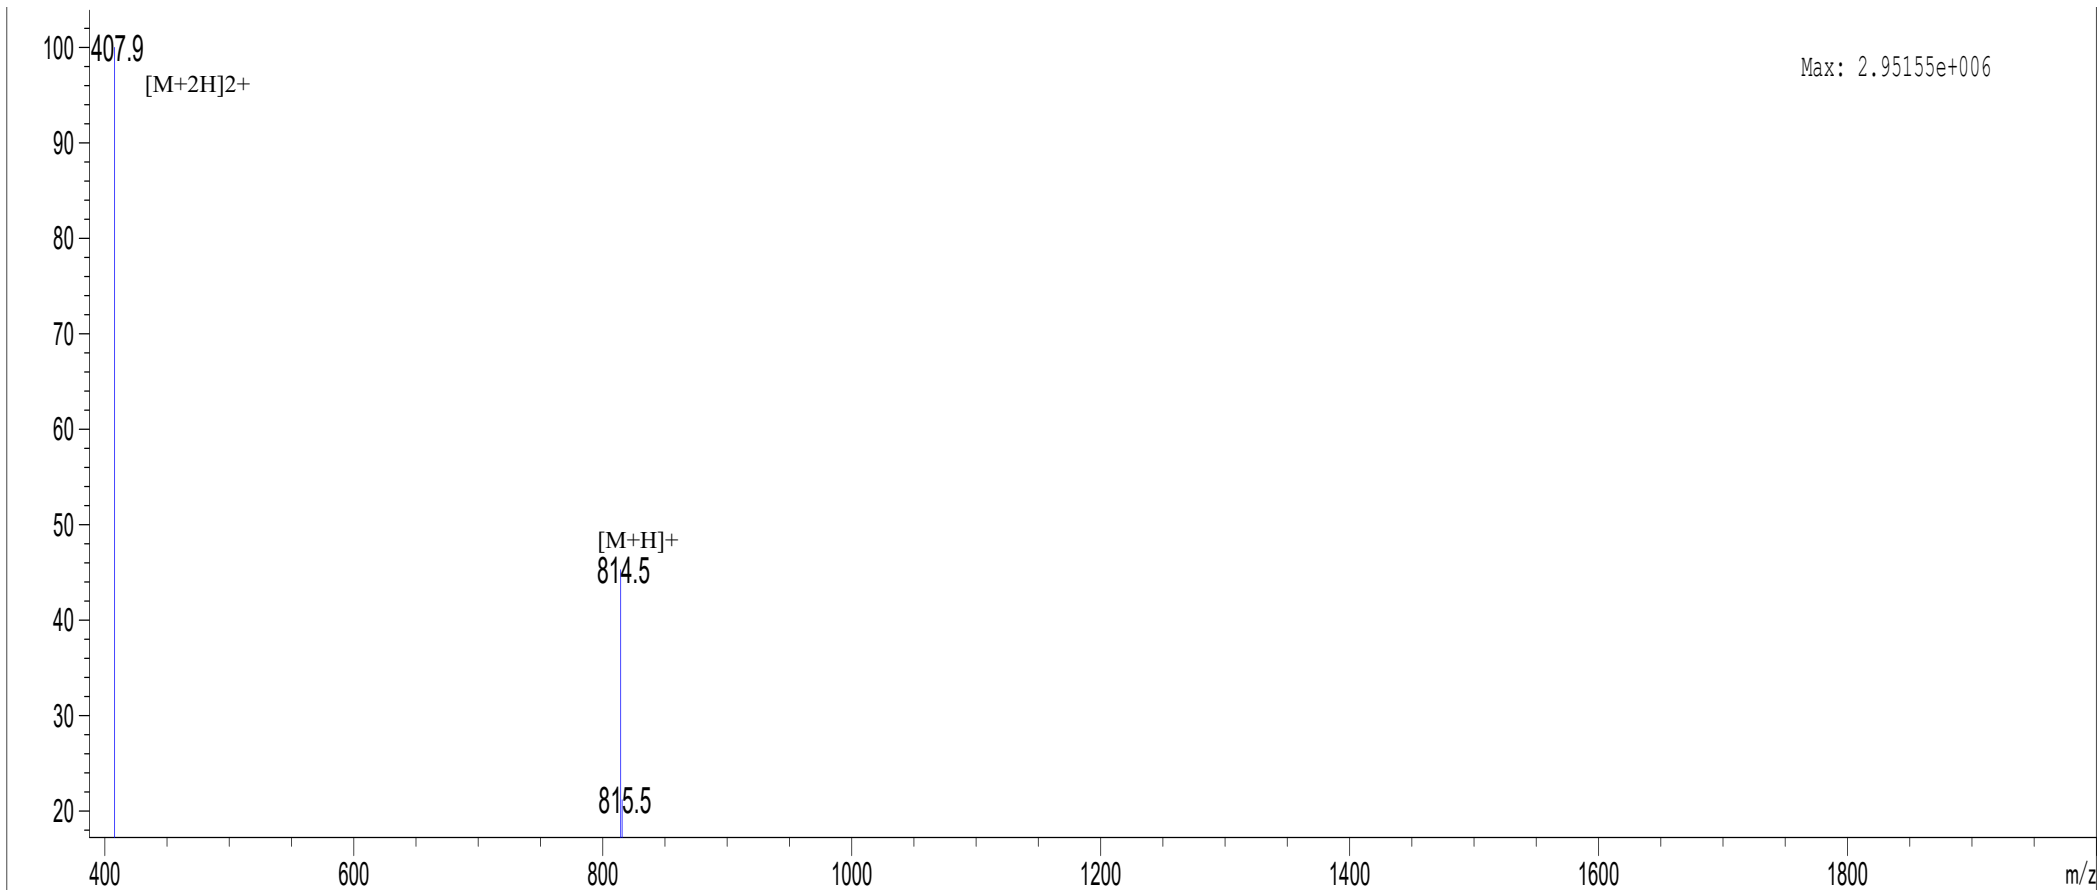

**Sample Description**

Analyzed date: 2022-11-16  
 Analyst: YDQ  
 Sample: VQDVLKL  
 M.W.: 813.98  
 Lot. No.: Yuanpeptide-1027848

**Instrument**

Agilent-6125B  
 Probe: ESI  
 Nebulizer Gas Flow: 1.5L/min  
 CDL: -20.0v  
 CDL Temp.: 250 °C  
 Block Temp.: 200 °C

Probe Bias: +4.5kv  
 Detector: 1.5kv  
 T. Flow: 0.2ml/min  
 B. Conc.: 50%H<sub>2</sub>O/50%ACN

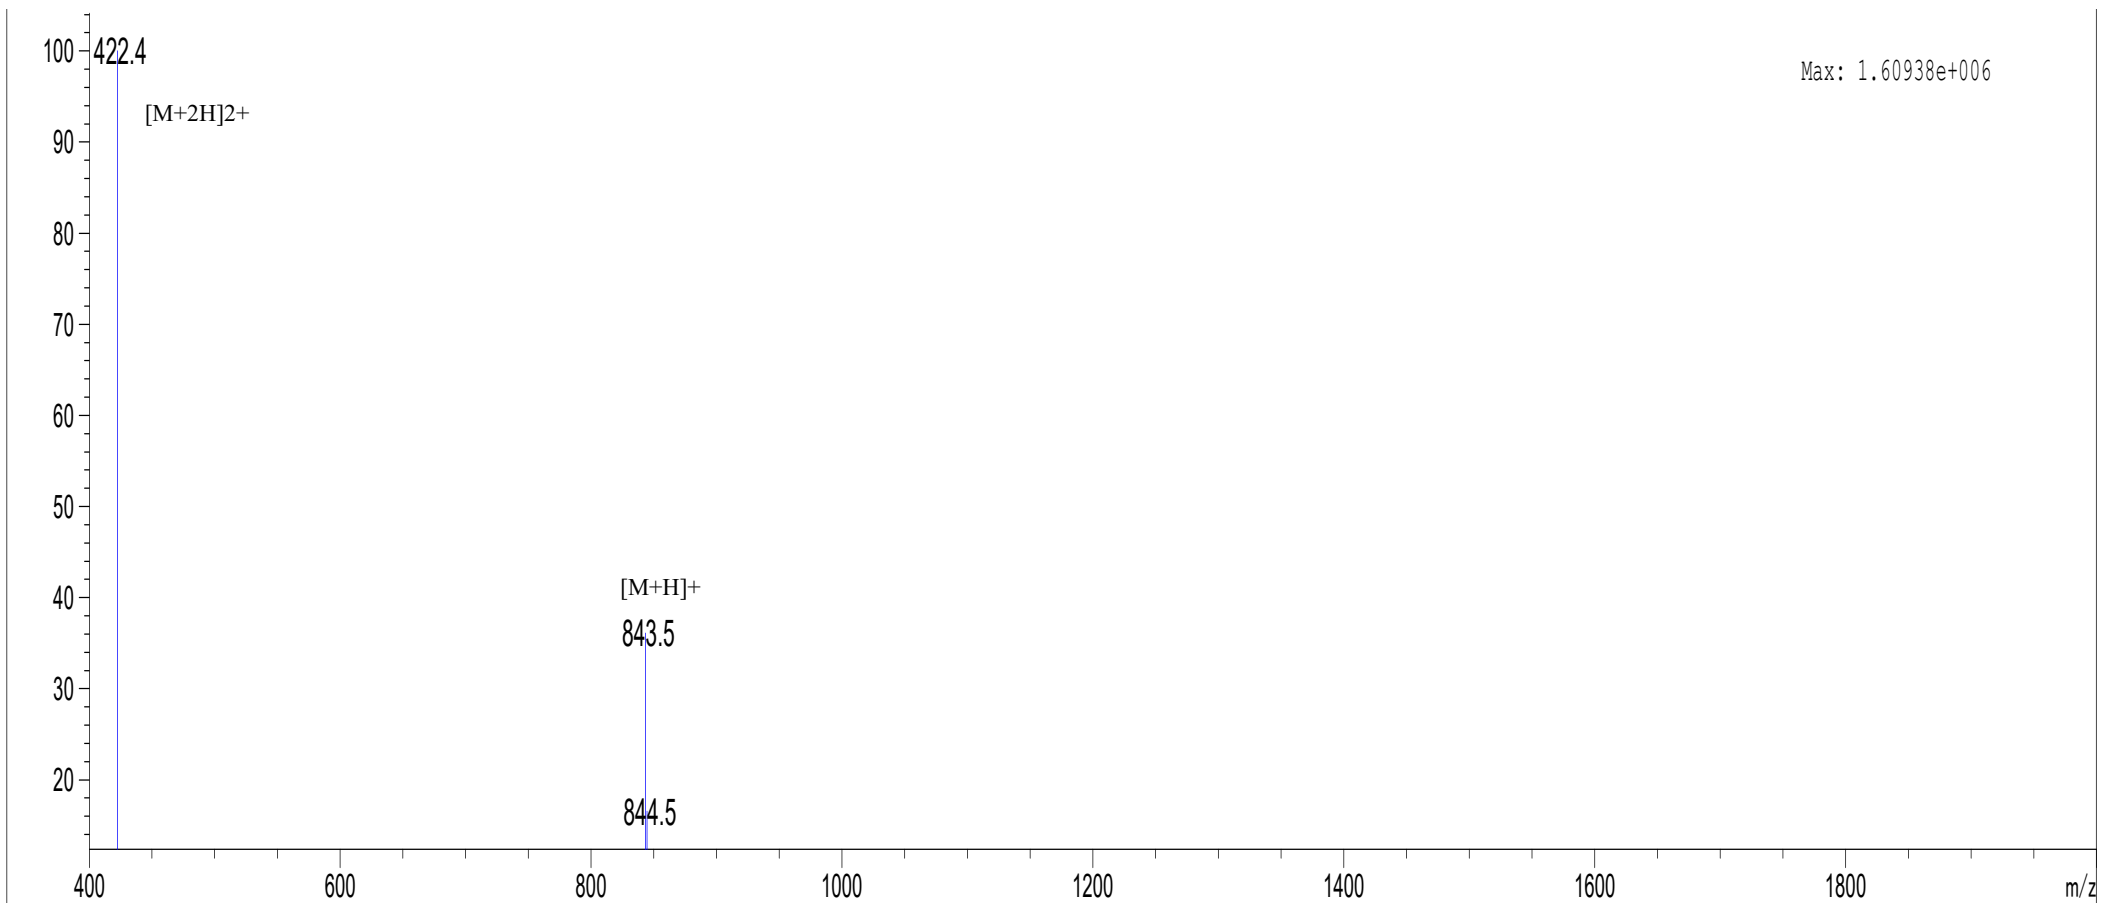

Sample Description

Analyzed date: 2022-11-16  
 Analyst: YDQ  
 Sample: VELLKLE  
 M.W.: 843.01  
 Lot. No.: Yuanpeptide-1027849

Instrument

Agilent-6125B  
 Probe: ESI  
 Nebulizer Gas Flow: 1.5L/min  
 CDL: -20.0v  
 CDL Temp.: 250 °C  
 Block Temp.: 200 °C

Probe Bias: +4.5kv  
 Detector: 1.5kv  
 T. Flow: 0.2ml/min  
 B. Conc.: 50%H2O/50%ACN

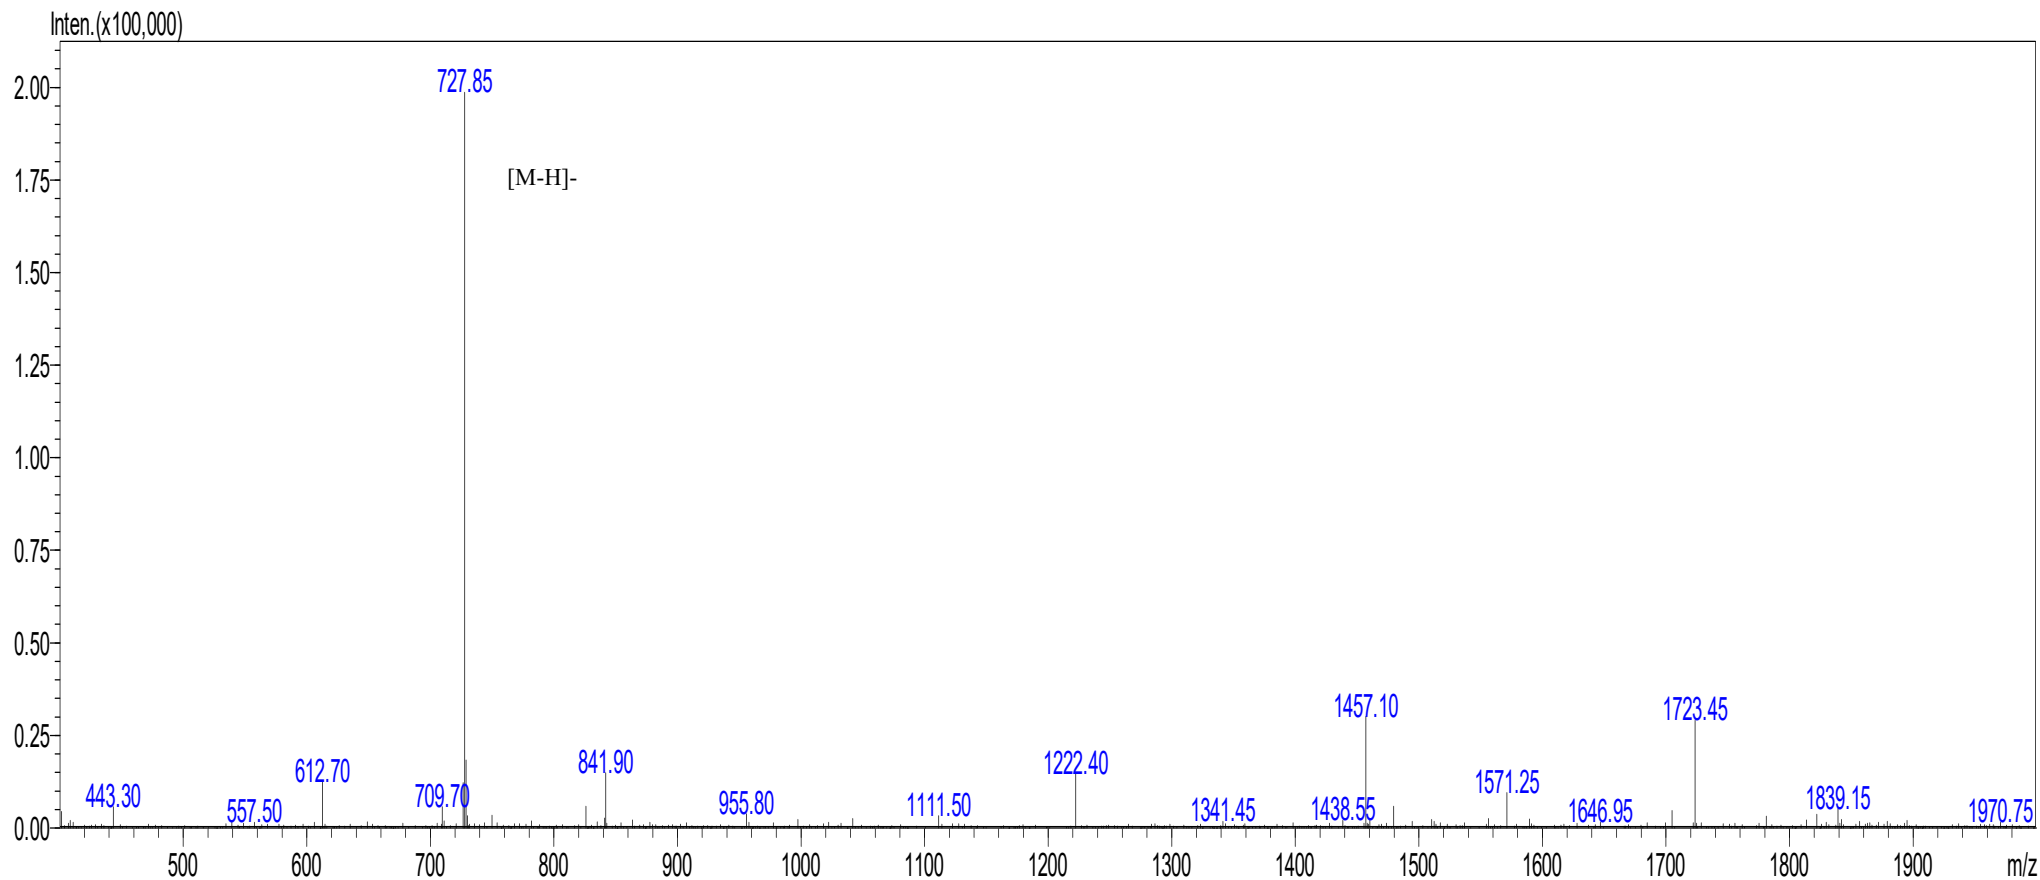

Sample Description

Analyzed date: 2022-11-15  
 Analyst: YDQ  
 Sample: LVVDGVK  
 M.W.: 728.87  
 Lot. No.: Yuanpeptide-1027850

Instrument

SHIMADZU LCMS-2020  
 Probe: ESI  
 Nebulizer Gas Flow: 1.5L/min  
 CDL: -20.0v  
 CDL Temp.: 250 °C  
 Block Temp.: 200 °C

SHIMADZU LCMS-2020

Probe Bias: +4.5kv  
 Detector: 1.5kv  
 T. Flow: 0.2ml/min  
 B. Conc.: 50%H2O/50%ACN

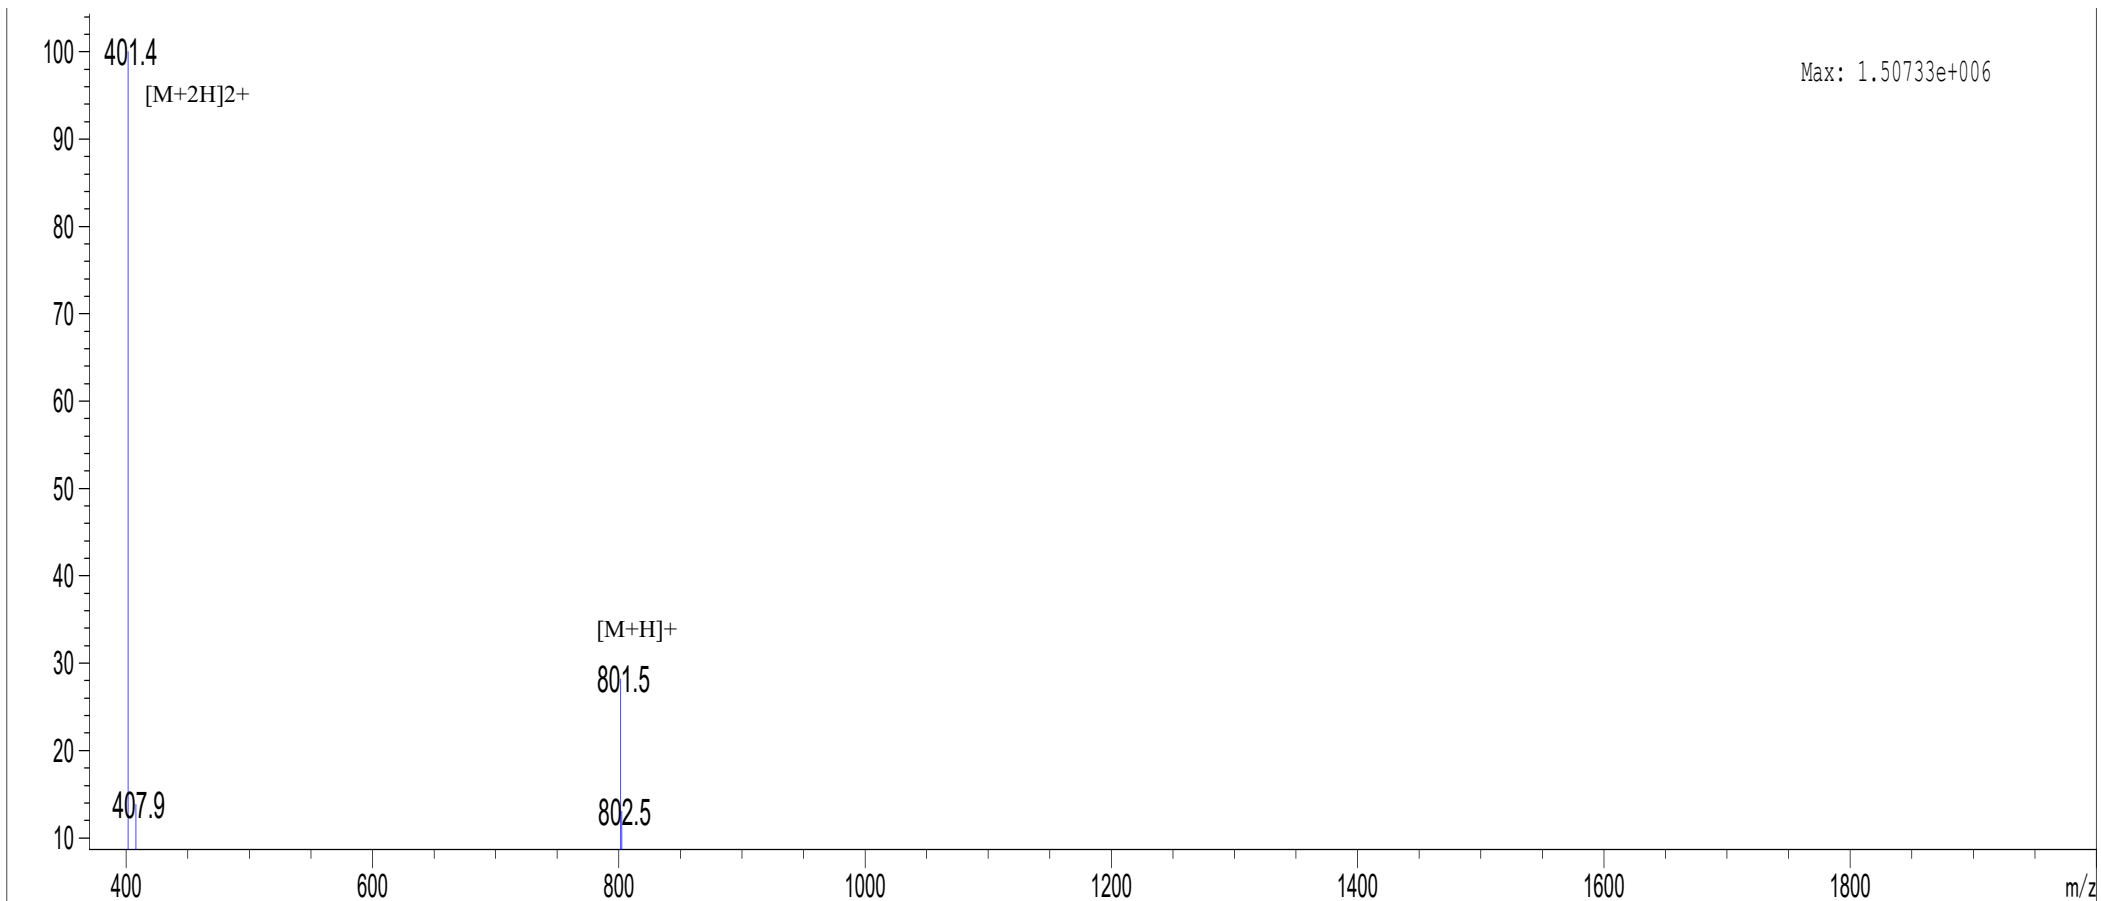

**Sample Description**

Analyzed date: 2022-11-16  
 Analyst: YDQ  
 Sample: VVDLTVR  
 M.W.: 800.94  
 Lot. No.: Yuanpeptide-1027851

**Instrument**

Agilent-6125B  
 Probe: ESI  
 Nebulizer Gas Flow: 1.5L/min  
 CDL: -20.0v  
 CDL Temp.: 250 °C  
 Block Temp.: 200 °C

Probe Bias: +4.5kv  
 Detector: 1.5kv  
 T. Flow: 0.2ml/min  
 B. Conc.: 50%H<sub>2</sub>O/50%ACN

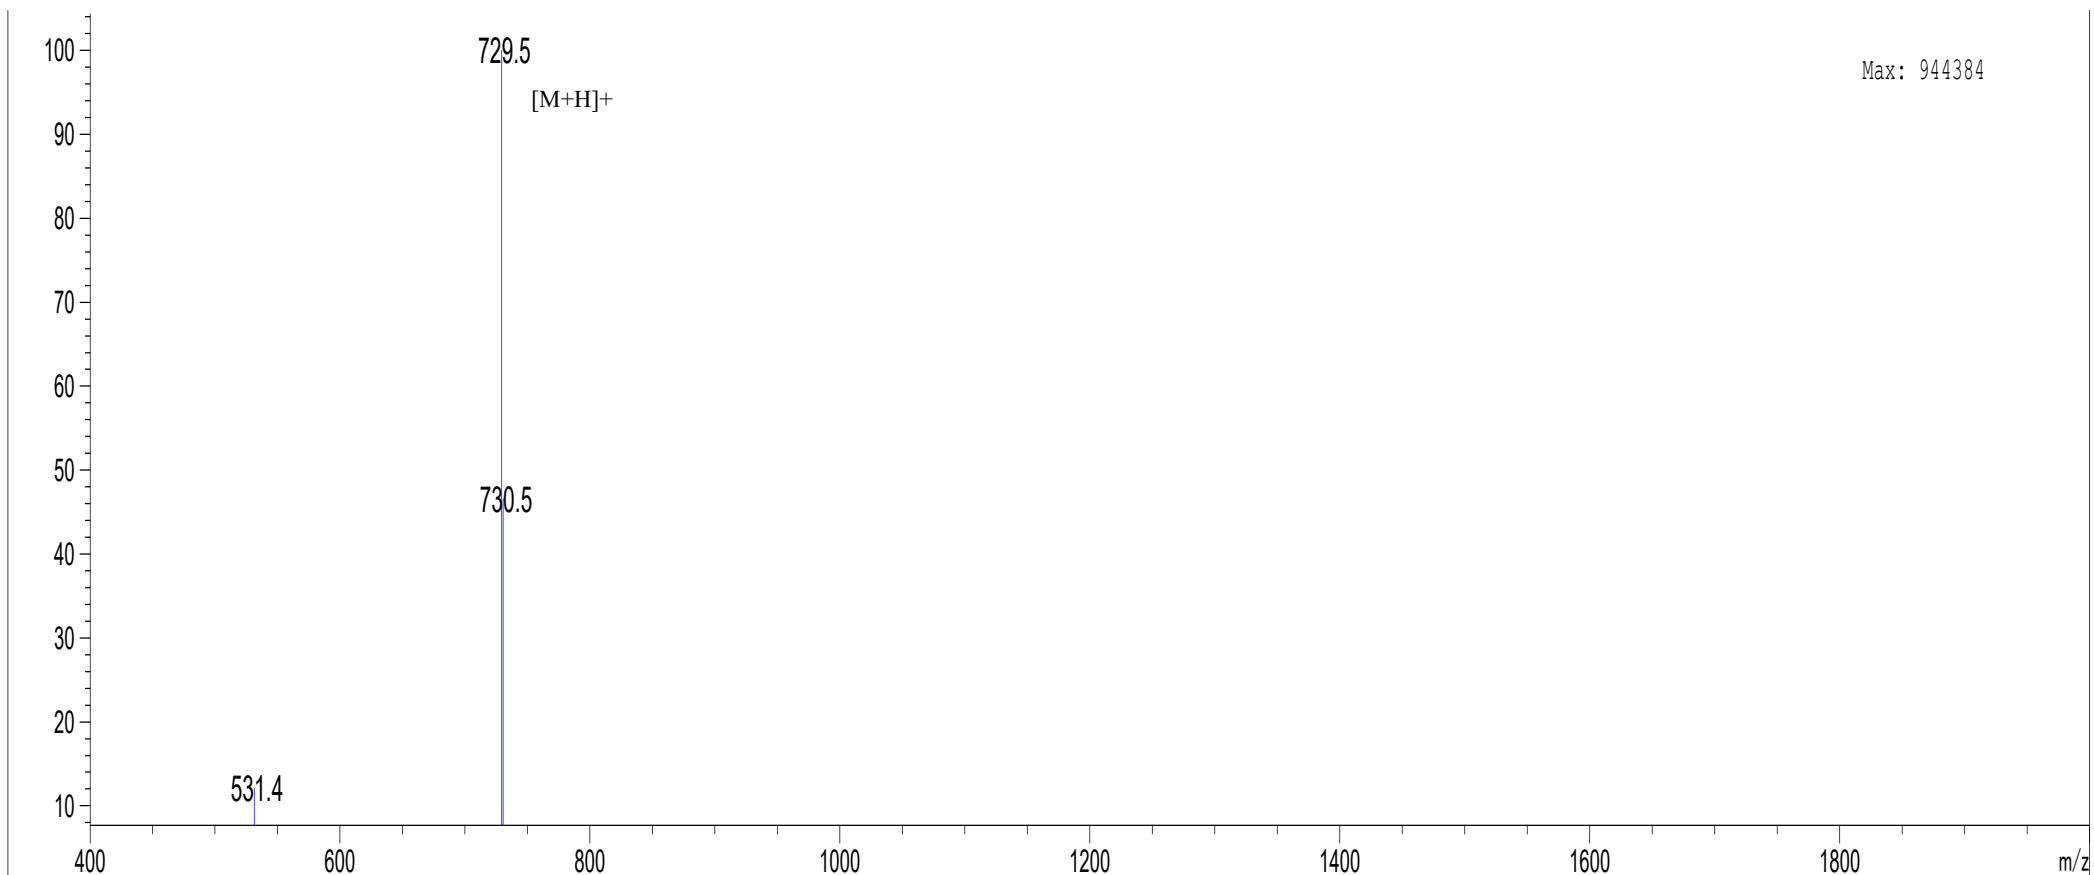

**Sample Description**

Analyzed date: 2022-11-16  
 Analyst: YDQ  
 Sample: VVDGVKL  
 M.W.: 728.87  
 Lot. No.: Yuanpeptide-1027852

**Instrument**

Agilent-6125B  
 Probe: ESI  
 Nebulizer Gas Flow: 1.5L/min  
 CDL: -20.0v  
 CDL Temp.: 250 °C  
 Block Temp.: 200 °C

**Agilent-6125B**

Probe Bias: +4.5kv  
 Detector: 1.5kv  
 T. Flow: 0.2ml/min  
 B. Conc.: 50%H<sub>2</sub>O/50%ACN

**Fig. S6. Secondary MS map of synthetic peptides**

**Table S7** Detailed information of electronic tongue sensor response

| Group | CA0  | CT0   | AAE  | C00   | AE1   | cpa(AAE) | cpa(CT0) | cpa(CA0) | cpa(C00) | cpa(AE1) |
|-------|------|-------|------|-------|-------|----------|----------|----------|----------|----------|
| U6-1  | 1.02 | 0.4   | 0.2  | 0     | -0.26 | 0.63     | -0.24    | 1.02     | 1.05     | -4.24    |
| U6-2  | 0.77 | 0.4   | 0.22 | -0.01 | -0.26 | 0.71     | -0.18    | 1.03     | 1.65     | -3.77    |
| U6-3  | 0.74 | 0.4   | 0.24 | -0.01 | -0.27 | 0.74     | -0.13    | 1.03     | 1.72     | -3.82    |
| U6-4  | 0.73 | 0.4   | 0.25 | -0.02 | -0.29 | 0.74     | -0.11    | 1.02     | 1.71     | -3.75    |
| B20-1 | 1.85 | -0.02 | 0.11 | 0.12  | -0.75 | 0.55     | -0.73    | 1.01     | 2.4      | -2.22    |
| B20-2 | 0.96 | -0.01 | 0.13 | 0.12  | -0.72 | 0.62     | -0.63    | 1.03     | 2.92     | -2.11    |
| B20-3 | 0.87 | 0     | 0.14 | 0.09  | -0.71 | 0.64     | -0.56    | 1.03     | 2.9      | -2.32    |
| B20-4 | 0.81 | 0     | 0.15 | 0.07  | -0.72 | 0.65     | -0.53    | 1.03     | 2.87     | -2.36    |
| B6-1  | 1.86 | 0.01  | 0.12 | 0.15  | -0.71 | 0.55     | -0.65    | 1.01     | 4.41     | -2.07    |
| B6-2  | 0.96 | 0.02  | 0.14 | 0.13  | -0.67 | 0.62     | -0.59    | 1.03     | 4.65     | -2.03    |
| B6-3  | 0.88 | 0.04  | 0.15 | 0.11  | -0.68 | 0.65     | -0.47    | 1.04     | 4.94     | -2.21    |
| B6-4  | 0.81 | 0.03  | 0.17 | 0.09  | -0.69 | 0.66     | -0.49    | 1.04     | 4.2      | -2.44    |
| B21-1 | 1.12 | -1.15 | 0.07 | 0.23  | -1.64 | 0.61     | -1.93    | 0.95     | 2.35     | -2.72    |
| B21-2 | 0.59 | -1.12 | 0.09 | 0.24  | -1.61 | 0.66     | -1.79    | 0.97     | 2.19     | -2.71    |
| B21-3 | 0.51 | -1.12 | 0.1  | 0.2   | -1.61 | 0.67     | -1.66    | 0.97     | 2.15     | -2.9     |
| B21-4 | 0.45 | -1.1  | 0.12 | 0.16  | -1.62 | 0.68     | -1.55    | 0.97     | 2.07     | -3.09    |
| B17-1 | 2.56 | 0.29  | 0.12 | 0.09  | -0.53 | 0.61     | -0.61    | 1        | 2.1      | -2.1     |
| B17-2 | 1.34 | 0.3   | 0.14 | 0.09  | -0.5  | 0.67     | -0.52    | 1.02     | 2.25     | -2.04    |
| B17-3 | 1.26 | 0.31  | 0.15 | 0.07  | -0.48 | 0.69     | -0.46    | 1.01     | 2.75     | -2.21    |
| B17-4 | 1.19 | 0.31  | 0.16 | 0.05  | -0.49 | 0.7      | -0.42    | 1.02     | 2.37     | -2.33    |
| U7-1  | 1.11 | 0.32  | 0.14 | -0.04 | -0.43 | 0.62     | -0.49    | 1.03     | 1.52     | -4.83    |
| U7-2  | 0.84 | 0.32  | 0.16 | -0.05 | -0.44 | 0.72     | -0.42    | 1.05     | 2.08     | -4.24    |
| U7-3  | 0.82 | 0.32  | 0.18 | -0.06 | -0.45 | 0.73     | -0.37    | 1.04     | 2.17     | -4.35    |
| U7-4  | 0.83 | 0.33  | 0.19 | -0.06 | -0.47 | 0.74     | -0.33    | 1.03     | 2.04     | -4.31    |
| B9-1  | 1.92 | 0.09  | 0.13 | 0.14  | -0.64 | 0.56     | -0.58    | 1.01     | 3.36     | -2.04    |
| B9-2  | 0.99 | 0.1   | 0.15 | 0.14  | -0.6  | 0.63     | -0.5     | 1.02     | 3.24     | -1.94    |
| B9-3  | 0.92 | 0.12  | 0.16 | 0.11  | -0.59 | 0.65     | -0.43    | 1.03     | 3.25     | -2.14    |
| B9-4  | 0.86 | 0.12  | 0.17 | 0.09  | -0.6  | 0.65     | -0.41    | 1.03     | 3.21     | -2.32    |
| U4-1  | 0.91 | -0.06 | 0.14 | 0     | -0.75 | 0.61     | -0.86    | 1.01     | 1.33     | -5.62    |
| U4-2  | 0.68 | -0.05 | 0.16 | -0.02 | -0.77 | 0.71     | -0.73    | 1.03     | 1.93     | -4.8     |
| U4-3  | 0.65 | -0.04 | 0.17 | -0.03 | -0.78 | 0.72     | -0.68    | 1.02     | 1.97     | -4.95    |
| U4-4  | 0.63 | -0.04 | 0.19 | -0.04 | -0.8  | 0.73     | -0.63    | 1.01     | 1.83     | -4.85    |
| U5-1  | 0.99 | 0.21  | 0.11 | -0.06 | -0.49 | 0.58     | -0.52    | 1.02     | 1.29     | -4.9     |
| U5-2  | 0.74 | 0.22  | 0.13 | -0.08 | -0.5  | 0.68     | -0.44    | 1.03     | 2.03     | -4.29    |
| U5-3  | 0.71 | 0.22  | 0.14 | -0.08 | -0.51 | 0.7      | -0.39    | 1.03     | 2.02     | -4.32    |
| U5-4  | 0.71 | 0.23  | 0.16 | -0.09 | -0.53 | 0.71     | -0.36    | 1.02     | 1.86     | -4.31    |
| U8-1  | 0.95 | 0.27  | 0.12 | -0.06 | -0.43 | 0.59     | -0.46    | 1.04     | 1.6      | -4.79    |
| U8-2  | 0.72 | 0.27  | 0.14 | -0.07 | -0.44 | 0.68     | -0.37    | 1.05     | 2.45     | -4.23    |
| U8-3  | 0.7  | 0.27  | 0.16 | -0.08 | -0.45 | 0.71     | -0.31    | 1.05     | 2.63     | -4.21    |
| U8-4  | 0.69 | 0.28  | 0.17 | -0.08 | -0.47 | 0.71     | -0.29    | 1.04     | 2.61     | -4.22    |
